# Supplementary material for: Spatial analysis on human brucellosis incidence in mainland China: 2004–2010
Source: PubMed Central journal article supplement — BMJ Open. 2014 Apr 8;4(4):e004470. doi: 10.1136/bmjopen-2013-004470 (PMC3987733; doi:10.1136/bmjopen-2013-004470), 2014-04-08
Supplement: bmjopen-2013-004470.draft_revisions.pdf [file bmjopen-2013-004470.draft_revisions.pdf]

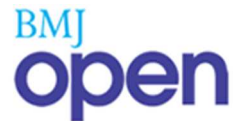

**Spatial analysis on human brucellosis incidence in mainland  
China: 2004-2010**

|                                 |                                                                                                                                                                                                                                                                                                                                                                                                                                                                                                                                                      |
|---------------------------------|------------------------------------------------------------------------------------------------------------------------------------------------------------------------------------------------------------------------------------------------------------------------------------------------------------------------------------------------------------------------------------------------------------------------------------------------------------------------------------------------------------------------------------------------------|
| Journal:                        | <i>BMJ Open</i>                                                                                                                                                                                                                                                                                                                                                                                                                                                                                                                                      |
| Manuscript ID:                  | bmjopen-2013-004470                                                                                                                                                                                                                                                                                                                                                                                                                                                                                                                                  |
| Article Type:                   | Research                                                                                                                                                                                                                                                                                                                                                                                                                                                                                                                                             |
| Date Submitted by the Author:   | 12-Nov-2013                                                                                                                                                                                                                                                                                                                                                                                                                                                                                                                                          |
| Complete List of Authors:       | Zhang, Junhui; Sichuan University, West China School of Public Health; Luzhou Medical College, School of Public Health<br>Yin, Fei; Sichuan University, West China School of Public Health<br>Zhang, Tao; Sichuan University, West China School of Public Health<br>Yang, Chao; Luzhou Medical College, School of Public Health<br>Zhang, Xingyu; Sichuan University, West China School of Public Health<br>Feng, Zijian; Chinese Center for Disease Control and Prevention,<br>Li, Xiaosong; Sichuan University, West China School of Public Health |
| <b>Primary Subject Heading</b>: | Epidemiology                                                                                                                                                                                                                                                                                                                                                                                                                                                                                                                                         |
| Secondary Subject Heading:      | Public health, Infectious diseases                                                                                                                                                                                                                                                                                                                                                                                                                                                                                                                   |
| Keywords:                       | Human brucellosis, exploratory spatial data analysis, empirical Bayes smoothing, spatial autocorrelation, cluster detection                                                                                                                                                                                                                                                                                                                                                                                                                          |
|                                 |                                                                                                                                                                                                                                                                                                                                                                                                                                                                                                                                                      |

SCHOLARONE™  
Manuscripts

1  
2  
3  
4 **Article type: research paper**

5  
6 **Spatial analysis on human brucellosis incidence in**  
7  
8 **mainland China: 2004-2010**

9  
10  
11 Junhui Zhang,<sup>1,2#</sup> Fei Yin,<sup>1#</sup> Tao Zhang,<sup>1</sup> Chao Yang,<sup>2</sup> Xingyu Zhang,<sup>1</sup> Zijian  
12  
13 Feng,<sup>3</sup> Xiaosong Li<sup>1\*</sup>

14  
15  
16 1 West China School of Public Health, Sichuan University, Chengdu 610041, PR  
17  
18 China

19  
20  
21 2 School of Public Health, Luzhou Medical College, Luzhou 646000, PR China

22  
23 3 Chinese Center for Disease Control and Prevention, Beijing 102206, PR China

24  
25  
26  
27  
28  
29 \*Correspondence to: Professor Xiaosong Li, Department of Medical Statistics,  
30  
31 West China School of Public Health, Sichuan University, No.17 Section 3, South  
32  
33 Renmin Road, Chengdu 610041, PR China. Tel: +86 18608021962

34  
35  
36 Email address: lixiaosong1019@163.com

37  
38  
39 # These authors contributed equally to this work

40  
41  
42  
43 **ABSTRACT**

44  
45  
46 **Objectives:** China has experienced a sharply increasing rate of human  
47  
48 brucellosis in recent years. Effective spatial monitoring of human brucellosis  
49  
50 incidence is very important for successful implementation of control and  
51  
52 prevention programs. The purpose of this paper is to apply exploratory spatial  
53  
54 data analysis (ESDA) methods and the empirical Bayes (EB) smoothing  
55  
56  
57  
58  
59  
60

1  
2  
3  
4 technique to monitor county-level incidence rates for human brucellosis in  
5  
6 mainland China from 2004 to 2010 by examining spatial patterns.  
7

8  
9 **Methods:** ESDA methods were used to characterize spatial patterns of EB  
10  
11 smoothed incidence rates for human brucellosis using county-level data  
12  
13 obtained from the China Information System for Disease Control and Prevention  
14  
15 (CISDCP) in mainland China from 2004 to 2010.  
16

17  
18  
19 **Results:** EB smoothed incidence rates for human brucellosis were spatially  
20  
21 dependent during 2004-2010. The local Moran test identified one significant  
22  
23 northern cluster of high human brucellosis risk (all P-values <0.01), which  
24  
25 persisted during the seven-year study period. High-risk counties were centered  
26  
27 in Inner Mongolia Autonomous Region and other Northern provinces (i.e., Hebei,  
28  
29 Shanxi, Jilin and Heilongjiang provinces) around the border with Inner Mongolia  
30  
31 Autonomous Region where animal husbandry had developed. The number of  
32  
33 high-risk counties increased from 25 in 2004 to 54 in 2010.  
34  
35  
36

37  
38  
39 **Conclusions:** ESDA methods and the EB smoothing technique can assist  
40  
41 public health officials in identifying high-risk areas. Allocating more resources to  
42  
43 high-risk areas could more effectively reduce human brucellosis incidence.  
44  
45

46  
47 **Keywords:** *Human brucellosis, exploratory spatial data analysis, empirical*  
48  
49 *Bayes smoothing, spatial autocorrelation, cluster detection*  
50

51  
52 **Word Count:** 2747  
53  
54  
55  
56  
57  
58  
59  
60

## ARTICLE SUMMARY

### Article focus

- The incidence rates of human brucellosis are not distributed evenly across regions in China. Awareness of the spatial patterns of human brucellosis is quite beneficial for the prevention and control of the disease.
- ESDA methods and the empirical Bayes smoothing technique are commonly combined to characterize spatial epidemiology of diseases.

### Key messages

- EB smoothed incidence rates for human brucellosis were spatially dependent during 2004-2010. The local Moran test identified one significant northern cluster of high human brucellosis risk, which persisted during the seven-year study period.
- High-risk counties were centered in Inner Mongolia Autonomous Region and other Northern provinces around the border with Inner Mongolia Autonomous Region where animal husbandry had developed.
- ESDA methods and the EB smoothing technique can assist public health officials in identifying high-risk areas.

### Strengths and limitations of this study

- ESDA methods and the EB smoothing technique were used to analyze spatial patterns of incidence rates for human brucellosis at the county level in mainland China. Therefore, random variability was reduced and greater stability of incidence rates was provided mainly in small counties and true

1  
2  
3  
4 cluster areas with low false-positive rates especially performing well on  
5  
6 outlier detection had a better chance of being detected.  
7

- 8  
9 ■ The number of reported cases of human brucellosis obtained from the  
10  
11 CISDCP system might be only part of the actual incidence of human  
12  
13 brucellosis across the country as human brucellosis is often underreported  
14  
15 or misdiagnosed.  
16  
17
- 18  
19 ■ Our analyses are based on county-level data. Smaller spatial units might  
20  
21 provide more location-specific information that can inform the design and  
22  
23 implementation stages of public health programs.  
24

## 25 26 **INTRODUCTION**

27  
28 Brucellosis, caused by *Brucella* species, is a zoonotic disease recognized as an  
29  
30 emerging and re-emerging threat to public and veterinary health.[1] The disease  
31  
32 is transmitted to humans by direct/indirect contact with infected animals or  
33  
34 through the consumption of contaminated foods.[2-4] People with occupational  
35  
36 exposure are at highest risk for brucellosis, in particular those performing  
37  
38 husbandry activities, butchering, and livestock trading.[5 6] Worldwide economic  
39  
40 losses due to brucellosis are extensive not only in animal production but also in  
41  
42 public health.[1] Although brucellosis has been eradicated from many  
43  
44 industrialized countries, new foci of disease continually appear, particularly in  
45  
46 parts of Asia.[7]  
47  
48

49  
50 Brucellosis is classified as one of the Class II national notifiable diseases by the  
51  
52 Centers for Disease Control and Prevention (CDC) and as a key disease in  
53  
54  
55  
56  
57  
58  
59  
60

1  
2  
3  
4 Class II as described by the Implement Detailed Rules of the By-law  
5  
6 on Disease Prevention and Control of Livestock and Poultry in mainland  
7  
8 China.[8] The disease was first reported in China in 1905.[8] Human brucellosis  
9  
10 incidence was quite severe before 1980s in the country, later decreased and  
11  
12 remained at a low level. From 1995 to 2001, the incidence of human brucellosis  
13  
14 increased rapidly, and spread more than 10 provinces.[8] In recent years, With  
15  
16 the rapid development of China's animal husbandry, human brucellosis  
17  
18 incidence had increased sharply.[9] Nationwide surveillance data indicated that  
19  
20 the total incidence rate of human brucellosis in mainland China increased from  
21  
22 0.92 cases per 100,000 people in 2004 to 2.62 cases per 100,000 people in  
23  
24 2010.[10] Currently, human brucellosis is considered an important public health  
25  
26 problem in mainland China.[11]

27  
28  
29 The incidence rates of human brucellosis are not distributed evenly across  
30  
31 regions in China.[10] Awareness of the spatial patterns of human brucellosis is  
32  
33 quite beneficial for the prevention and control of the disease. Exploratory spatial  
34  
35 data analysis (ESDA) methods are emerging useful approaches to achieve this  
36  
37 understanding.[12] ESDA is a set of techniques used to describe and visualize  
38  
39 spatial distributions, identify atypical locations or spatial outliers, discover  
40  
41 patterns of spatial association, clusters or hot spots, and suggest spatial regimes  
42  
43 or other forms of spatial heterogeneity.[12 13] The methods can be applied by  
44  
45 health officials to monitor spatial variations in disease rates, which can assist  
46  
47 health officials in designing more location-specific control and prevention  
48  
49  
50  
51  
52  
53  
54  
55  
56  
57  
58  
59  
60

1  
2  
3 programs who take into account global and local spatial influences.[14]  
4  
5  
6 Measures of spatial autocorrelation are at the core of ESDA methods.[13] ESDA  
7  
8  
9 methods and the empirical Bayes (EB) smoothing technique are commonly  
10  
11 combined to characterize spatial epidemiology of diseases.[14-17] The EB  
12  
13 smoothing technique is used to reduce random variation and to provide greater  
14  
15 stability of rates mainly in small areas associated with small populations.[16]  
16  
17  
18 The primary purpose of this paper is to apply ESDA methods and the EB  
19  
20 smoothing technique to monitor county-level incidence rates for human  
21  
22 brucellosis in mainland China from 2004 to 2010 by examining spatial patterns.  
23  
24 We also identified the potential presence of clusters of the disease in mainland  
25  
26 China, thus to provide spatial guidance for future research.  
27  
28  
29

## 30 31 **METHODS**

### 32 33 **Data source**

34  
35 Human brucellosis cases including 2872 counties in mainland China from 2004  
36  
37 to 2010 were collected through the Internet-based disease-reporting system  
38  
39 (China Information System for Disease Control and Prevention, CISDCP), which  
40  
41 was established in 2004 and was more integrated, effective, and reliable than  
42  
43 the previous case-reporting system.[18 19] In this paper, the incidence rates of  
44  
45 human brucellosis in fact referred to the reported incidence rates. We used  
46  
47 seven-year reported human brucellosis cases to provide a stable measure of  
48  
49 disease incidence rate by time and location at the county level.[20] In order to  
50  
51 conduct a geographic information system (GIS) -based analysis of the spatial  
52  
53  
54  
55  
56  
57  
58  
59  
60

1  
2  
3  
4 distribution of human brucellosis, the county-level polygon map at a 1:1,000,000  
5  
6 scale was obtained.[20] Demographic information based on the 2000 census  
7  
8 was acquired from the National Bureau of Statistics of China. All human  
9  
10 brucellosis cases were geocoded and matched to the county-level layers of the  
11  
12 polygons by administrative code using the software Mapinfo7.0.[20]  
13  
14

### 15 16 **EB smoothing technique**

17  
18 When raw rates derived from different counties across the whole study area are  
19  
20 applied to estimate the underlying disease risk, differences in population size  
21  
22 result in variance instability and spurious outliers. This is because the rates  
23  
24 observed in areas with small populations may be highly unstable in that the  
25  
26 addition or deletion of one or two cases can cause drastic changes in the  
27  
28 observed values. Therefore, raw rates may not fully represent the relative  
29  
30 magnitude of the underlying risks if compared with other counties with high  
31  
32 population base. To overcome this problem, the EB smoothing technique  
33  
34 proposed by Clayton and Kaldor[16] was applied to our brucellosis data. This  
35  
36 method adjusts raw rates by incorporating data from other neighbouring spatial  
37  
38 units.[21] Essentially, raw rates get 'shrunk' towards an overall mean which is an  
39  
40 inverse function of the variance. Application of EB smoothed incidence rate not  
41  
42 only provides better visualization compared to raw rate but also serves to find  
43  
44 true outliers.[22]  
45  
46  
47  
48  
49  
50  
51  
52

### 53 54 **Spatial autocorrelation analysis**

55  
56 We performed spatial autocorrelation analysis in GeoDa0.9.5-i software.[23]  
57  
58  
59  
60



1  
2  
3  
4 Both global and local Moran's I statistics were calculated. The global Moran's I  
5  
6  
7  
8  
9  
10  
11  
12  
13  
14  
15  
16  
17  
18  
19  
20  
21  
22  
23  
24  
25  
26  
27  
28  
29  
30  
31  
32  
33  
34  
35  
36  
37  
38  
39  
40  
41  
42  
43  
44  
45  
46  
47  
48  
49  
50  
51  
52  
53  
54  
55  
56  
57  
58  
59  
60

Both global and local Moran's I statistics were calculated. The global Moran's I statistic was estimated to assess the evidence of global spatial autocorrelation (clustering) of incidence rates over the study region.[24] Anselin's local Moran's I (LISA) statistic indicates the location of local clusters and spatial outliers.[25] Spatial autocorrelation statistics for human brucellosis incidence rates were calculated based on the assumption of constant variance. The assumption might be violated when incidence rates at the county level varied greatly across the whole study region.[26] The EB smoothing technique was performed to adjust for this violation. The standardized first-order contiguity Queen neighbors were used as the criteria for identifying neighbors in this paper. A significant test was performed through the permutation test, and a reference distribution was generated under an assumption that the incidence was randomly distributed. In order to obtain more robust results, the number of permutation test was set to 9999. Since multiple comparisons increased the chances of identifying overlapping clusters, the significance level was set at 0.01. Based on these permutations and threshold, we have plotted values on a map to display the location of human brucellosis clusters in mainland China.[27]

## RESULTS

### Annualized average of human brucellosis from 2004 to 2010

A total of 164,752 human brucellosis cases were reported in mainland China from 2004 to 2010. Annual EB smoothed incidence rates for human brucellosis for all 2872 counties were calculated. Table 1 presents 28 counties with annual

1  
2  
3  
4 EB smoothed incidence rates for human brucellosis over 100 cases per 100, 000  
5  
6  
7  
8  
9  
10  
11  
12  
13  
14  
15  
16  
17  
18  
19  
20  
21  
22  
23  
24  
25  
26  
27  
28  
29  
30  
31  
32  
33  
34  
35  
36  
37  
38  
39  
40  
41  
42  
43  
44  
45  
46  
47  
48  
49  
50  
51  
52  
53  
54  
55  
56  
57  
58  
59  
60

EB smoothed incidence rates for human brucellosis over 100 cases per 100, 000 people, which accounted for 34.41% of all cases in the country during the study period. Inner Mongolia Autonomous Region had the highest number of 23, centered in Xilin Gol League, Ulanqab League, Hulunbeier City, Xing'an League, Baotou City, Chifeng City, Hohhot City, and Tongliao City.

Summary statistics for the annual EB smoothed incidence rates for all counties were calculated. The mean and standard deviation were 4.64 and 38.66, respectively, per 100,000 people. The statistic for outliers was the computed z-value, which was the difference between the observed and expected mean of the annual EB smoothed incidence rates standardized by the standard deviation. Thus, it had a mean of zero and a standard deviation of 1. Sunitezuo Banner in Xilin Gol League in Inner Mongolia had the highest annual EB smoothed incidence rate of 1209.60, with 31.16 standard deviations from the mean. All 28 counties were at least 2.59 standard deviations from the mean, as shown in Table 1.

Table 1 Counties with annual EB smoothed incidence rates of human brucellosis over 100 per 100, 000 in mainland China, 2004–2010

| No. | Province     | City                | County                            | Rate*   | Z-value | P-value | Rank |
|-----|--------------|---------------------|-----------------------------------|---------|---------|---------|------|
| 1   | Inner        | Xilin Gol           | Sunitezuo Banner                  | 1209.60 | 31.16   | <0.001  | 1    |
| 2   | Mongolia     | League              | Abag Banner                       | 1004.10 | 25.85   | <0.001  | 2    |
| 3   |              |                     | Bordered Yellow Banner            | 826.90  | 21.27   | <0.001  | 3    |
| 4   |              |                     | Plain Blue Banner                 | 364.40  | 9.30    | <0.001  | 4    |
| 5   |              |                     | Zhenxianghuang Banner             | 303.70  | 7.73    | <0.001  | 5    |
| 6   |              |                     | Sunite Right Banner               | 294.60  | 7.50    | <0.001  | 6    |
| 7   |              |                     | west ujimqin banner               | 243.50  | 6.18    | <0.001  | 9    |
| 8   |              |                     | Xilinhot City                     | 236.80  | 6.00    | <0.001  | 10   |
| 9   |              |                     | East Ujumqin Banner               | 219.00  | 5.54    | <0.001  | 11   |
| 10  |              |                     | Duolun County                     | 176.70  | 4.45    | <0.001  | 15   |
| 11  |              | Ulanqab League      | Siziwang Banner                   | 257.90  | 6.55    | <0.001  | 7    |
| 12  |              |                     | Huade County                      | 179.00  | 4.51    | <0.001  | 14   |
| 13  |              |                     | Qahar Right Wing<br>Rear Banner   | 163.90  | 4.12    | <0.001  | 16   |
| 14  |              |                     | Shangdu County                    | 142.40  | 3.56    | <0.001  | 20   |
| 15  |              |                     | Chahar Right Middle<br>Banner     | 128.80  | 3.21    | <0.002  | 23   |
| 16  |              | Hulunbeier<br>City  | New Barhu Right<br>Banner         | 255.10  | 6.48    | <0.001  | 8    |
| 17  |              |                     | New Barhu Left<br>Banner          | 203.40  | 5.14    | <0.001  | 13   |
| 18  |              |                     | Zhalantun City                    | 144.20  | 3.61    | <0.001  | 19   |
| 19  |              | Xing'an League      | Horqin Right Wing<br>Front Banner | 146.00  | 3.66    | <0.001  | 18   |
| 20  |              | Baotou City         | Daerhanmaomingan<br>Union Banner  | 129.80  | 3.24    | <0.002  | 22   |
| 21  |              | Chifeng City        | Keshiketeng Banner                | 126.50  | 3.15    | <0.002  | 24   |
| 22  |              | Hohhot City         | Qingshuihe County                 | 123.90  | 3.08    | <0.005  | 25   |
| 23  |              | Tongliao City       | Jarud Banner                      | 104.90  | 2.59    | <0.010  | 28   |
| 24  | Shanxi       | Datong City         | Tianzhen County                   | 162.30  | 4.08    | <0.001  | 17   |
| 25  |              |                     | Guangling County                  | 136.50  | 3.41    | <0.001  | 21   |
| 26  |              | Xinzhou City        | Shengchi County                   | 107.70  | 2.67    | <0.010  | 27   |
| 27  | Heilongjiang | Qiqihar City        | Meris Daur District               | 208.10  | 5.26    | <0.001  | 12   |
| 28  | Hebei        | Zhangjiakou<br>City | Chicheng County                   | 117.60  | 2.92    | <0.005  | 26   |

Rate\*: These are annual EB smoothed incidence rates for human brucellosis.

1  
2  
3  
4 Figure 1 presented a percentile map of annual EB smoothed incidence rates for  
5  
6 human brucellosis in mainland China by county from 2004 to 2010. The figure  
7  
8 gives an indication of spatial associations: counties with similar colour shades  
9  
10 tended to be near each other. Outlier counties with extreme values were  
11  
12 highlighted (both high as well as low). Six legend categories were created,  
13  
14 corresponding to < 1%, 1% to <10%, 10% to <50%, 50% to <90%, 90% to <99%  
15  
16 and >99%. There were 29 counties at the high end.  
17  
18  
19

20  
21 The global Moran's I value of annual EB smoothed incidence rates for human  
22  
23 brucellosis in mainland China by county from 2004 to 2010 was 0.5803 ( $Z=$   
24  
25 8.3660,  $P=0.0025$ ), statistically significant at the 0.01 level.  
26  
27

28  
29 We also calculated the local Moran's I and gave a LISA cluster map of annual  
30  
31 EB smoothed incidence rates for human brucellosis in mainland China by county  
32  
33 from 2004 to 2010. LISA cluster map showed those counties with a significant  
34  
35 local Moran statistic classified by type of spatial correlation: bright red for the  
36  
37 high-high association, bright blue for low-low, light blue for low-high, and light red  
38  
39 for high-low (Figure 2). The high-high and low-low locations suggest clustering of  
40  
41 similar values, whereas the high-low and low-high locations indicate spatial  
42  
43 outliers, whereas the high-low and low-high locations indicate spatial  
44  
45 outliers.  
46  
47

48  
49 The Local Moran's I method of annual EB smoothed incidence rates for human  
50  
51 brucellosis showed major clustered areas of high human brucellosis risk located  
52  
53 in northern China. High-risk counties were centered in Inner Mongolia (40  
54  
55 counties, 72.3%), Hebei (7 counties, 12.7%), Shanxi (5 counties, 9.1%),  
56  
57  
58  
59  
60

Heilongjiang (2 counties, 3.6%) and Jilin provinces (1 county, 1.8%) and included a total of 55 counties. These provinces accounted for 90.88% of the reported cases. EB smoothed incidence rates for these counties ranged from 7.70 to 1209.60 cases per 100,000 people.

<<Insert figure 1 here>>

<<Insert figure 2 here>>

### Changes in human brucellosis incidence rates from 2004 to 2010

The value of Global Moran's  $I$  of EB smoothed incidence rates increased from 0.2460 to 0.6179 during 2004-2010, indicating that the spatial distribution of human brucellosis had become more uneven (that is, the clustering of high and low values is becoming more prominent) (Table 2). The formal test of spatial dependence was statistically significant at the 0.01 level, implying that distribution of human brucellosis was spatially dependent in mainland China.

Table 2 Global spatial autocorrelation analyses for EB smoothed incidence rates for human brucellosis in mainland China (per year), 2004–2010

| Year | Moran's $I$ | Z-score | $P$ value |
|------|-------------|---------|-----------|
| 2004 | 0.2460      | 4.7733  | 0.0087    |
| 2005 | 0.4734      | 9.0229  | 0.0012    |
| 2006 | 0.4662      | 7.6853  | 0.0026    |
| 2007 | 0.5063      | 7.3102  | 0.0042    |
| 2008 | 0.5594      | 8.4932  | 0.0025    |
| 2009 | 0.5509      | 8.3389  | 0.0020    |
| 2010 | 0.6179      | 11.1187 | 0.0002    |

The clustered areas varied during the seven-year study period (Figure 3). The number of high-risk counties—that is, those counties included in clustered areas of high human brucellosis risk identified by the local Moran's  $I$

1  
2  
3  
4 method—increased from 25 in 2004 to 54 in 2010.

5  
6 The number of high-risk counties in Inner Mongolia Autonomous Region was the  
7  
8 largest one, increased from 22 in 2004 to 46 in 2010. Among the 101 counties in  
9  
10 Inner Mongolia Autonomous Region, the number of EB smoothed incidence  
11  
12 rates over 100 cases per 100,000 people increased from 8 in 2004 to 29 in 2010.  
13  
14 The most notable change was that the EB smoothed incidence rate in Sunitezuo  
15  
16 Banner increased from 373.7 in 2004 to 2,482.1 in 2009, but then decreased to  
17  
18 1,443.0 cases per 100,000 people in 2010.  
19  
20

21  
22 In Hebei Province, the number of high-risk counties kept an upward trend, rising  
23  
24 from 1 in 2004 to 3 in 2010. The most noteworthy change was that the EB  
25  
26 smoothed incidence rate in Wei County increased from 9.70 to 79.40 cases per  
27  
28 100,000 people between 2004 and 2010.  
29  
30

31  
32 The number of high-risk counties in Shanxi Province increased from zero in  
33  
34 2004 to 2 in 2010. The most notable change was that the EB smoothed  
35  
36 incidence rate in Xinrong District increased from 0.9 to 88.1 cases per 100,000  
37  
38 people between 2004 and 2010.  
39  
40

41  
42 In Jilin Province, the number of high-risk counties increased from zero in 2004 to  
43  
44 3 in 2010. The most notable change was that the EB smoothed incidence rate in  
45  
46 Tongyu County increased from zero to 155.6 cases per 100,000 people between  
47  
48 2004 and 2010.  
49  
50

51  
52 In Heilongjiang Province, the number of high-risk counties decreased from 2 to 0  
53  
54 between 2004 and 2010. Meris Daur District had the highest EB smoothed  
55  
56  
57  
58  
59  
60

1  
2  
3  
4 incidence rates of human brucellosis in the province, at more than 130 cases per  
5  
6 100,000 people per year between 2004 and 2010. The most notable change was  
7  
8 that the EB smoothed incidence rate in Zhaozhou County increased from 1.3 to  
9  
10 74.2 cases per 100,000 people between 2004 and 2010.  
11  
12

13  
14 <<Insert figure 3 here>>  
15

## 16 **DISCUSSION**

17  
18 In this paper, ESDA methods were used to explore spatial patterns of EB  
19  
20 smoothed incidence rates for human brucellosis at the county level in mainland  
21  
22 China from 2004 to 2010. We found that the occurrence of human brucellosis  
23  
24 persisted throughout many areas of the country and was spatially dependent  
25  
26 during the seven-year study period. Since human brucellosis is not a contagious  
27  
28 disease, spatial clusters of human brucellosis are most likely a result of animal  
29  
30 processing, shared food sources, more intensive agricultural production zones,  
31  
32 or similar socio-cultural practices.[17 28] Further researches are needed to  
33  
34 determine whether China's human brucellosis clusters are associated with  
35  
36 specific natural and/or social environmental characteristics. During the period  
37  
38 2004-2010, the areas with serious epidemics of human brucellosis persisted in  
39  
40 Inner Mongolia Autonomous Region and other Northern provinces (i.e., Hebei,  
41  
42 Shanxi, Jilin and Heilongjiang provinces) around the border with Inner Mongolia  
43  
44 Autonomous Region where animal husbandry had developed, all of which were  
45  
46 epidemic regions before the 1980s. This spatial pattern may be related to the  
47  
48 trans-boundary transfer of animal brucellosis in the region of Inner Mongolia  
49  
50  
51  
52  
53  
54  
55  
56  
57  
58  
59  
60

1  
2  
3  
4 from the neighboring hyper-endemic Mongolia, which had been described as the  
5  
6 country with the second highest incidence worldwide.[7 29] In addition, the  
7  
8 leading risk factors for the high incidence rate of human brucellosis were the  
9  
10 increase in animal feeding, lack of immunization and animal quarantine, and  
11  
12 frequent trading.[9 29]

13  
14  
15 Several intervention strategies had been suggested to reduce the incidence of  
16  
17 human brucellosis, such as increasing local knowledge of proper food handling  
18  
19 techniques of dairy products including pasteurization, decreasing occupational  
20  
21 exposures, quarantining, separating and eliminating of infected animals with  
22  
23 brucellosis, establishing surveillance point of brucellosis and its network, and  
24  
25 vaccination programs aimed at reducing the prevalence of disease in livestock.[8  
26  
27  
28  
29  
30  
31  
32  
33  
34  
35  
36  
37  
38  
39  
40  
41  
42  
43  
44  
45  
46  
47  
48  
49  
50  
51  
52  
53  
54  
55  
56  
57  
58  
59  
60

30] However, Zhang[9] suggested that the most effective means of human  
brucellosis control were the comprehensive measures of universal immunization  
in livestock without quarantine in epidemic regions, which had been proved  
effective measures before.

Previous study analyzed cluster identification of the annualized raw incidence  
rates of county-level human brucellosis in China by using SaTScan and ArcGIS  
software.[31] We identified similar clustered areas, though the previous study  
identified more high-risk counties than our study. This may be the results from  
different clustering methodologies[32] and different significance levels. In our  
study, more high-risk counties will be identified if a significance level of 0.05 was  
used. Our study differs from previous study in several ways. First, we used the



1  
2  
3  
4 EB smoothing technique to smooth the human brucellosis incidence rates.  
5

6 Therefore, random variability was reduced and greater stability of incidence  
7  
8 rates was provided mainly in small counties. Second, LISA has a better chance  
9  
10 of detecting true cluster areas with low false-positive rates especially performing  
11  
12 well on outlier detection.[32] In addition, our paper provides changes in human  
13  
14 brucellosis incidence rates from 2004 to 2010. This is the first study, to the best  
15  
16 of our knowledge, which has applied both ESDA methods and the EB smoothing  
17  
18 technique to analyze spatial patterns of incidence rates for human brucellosis at  
19  
20 the county level in mainland China. We believe that conclusions based on the  
21  
22 combinations of the two methods provide reliable results.  
23  
24  
25  
26  
27

28 Our study is not without limitations. First of all, the number of reported cases of  
29  
30 human brucellosis obtained from the CISDCP system might be only part of the  
31  
32 actual incidence of human brucellosis across the country as human brucellosis  
33  
34 is often underreported or misdiagnosed.[29] True human brucellosis rates might  
35  
36 be much higher than reported. Nevertheless, the data used in this paper are still  
37  
38 able to reflect the current trend in human brucellosis incidence in mainland  
39  
40 China. Secondly, our analyses are based on county-level data. Smaller spatial  
41  
42 units might provide more location-specific information that can inform the design  
43  
44 and implementation stages of public health programs.[14] The methods  
45  
46 employed in this paper can be applied to finer geographic units (e.g. postal units).  
47  
48 Finer geographic units to identify clusters within counties with higher burdens of  
49  
50 human brucellosis would be focused on in further research.  
51  
52  
53  
54  
55  
56  
57  
58  
59  
60

1  
2  
3  
4 In conclusion, our study offered a good understanding of the spatial patterns of  
5  
6 human brucellosis incidence in mainland China, and might contribute to  
7  
8 determine allocating resources to high risk areas in order to reduce human  
9  
10 brucellosis incidence. With the assistance of the spatial framework provided by  
11  
12 our study, China's human brucellosis control programs could be focused on  
13  
14 locations where they will have the greatest influence.  
15  
16  
17  
18  
19  
20

21 **Contributors** JZ designed the research, collected data, drafted the manuscript,  
22  
23 analysed the data and interpreted the results. FY designed the research,  
24  
25 collected data, interpreted the results critically reviewed and edited the  
26  
27 manuscript. TZ, CY, XZ interpreted the results critically reviewed and edited the  
28  
29 manuscript. XL designed the research, interpreted the results, critically reviewed  
30  
31 and edited the manuscript and funding, and supervised. ZH offered research  
32  
33 data and edited the manuscript. All authors read and approved the final  
34  
35 manuscript.  
36  
37  
38  
39  
40

41 **Funding** This work was supported by the National Infectious Disease  
42  
43 Surveillance Program of the Ministry of Science and Technology of the People's  
44  
45 Republic of China (No.2012ZX10004201) and the National Natural Science  
46  
47 Foundation of China (No. 30571618) .The funders had no role in study design,  
48  
49 data collection and analysis, decision to publish, or preparation of the  
50  
51 manuscript.  
52  
53  
54

55 **Competing interests** None.  
56  
57  
58  
59  
60

1  
2  
3  
4 **Provenance and peer review** Not commissioned; externally peer reviewed.  
5

6 **Data sharing statement** No additional data are available.  
7

## 8 **REFERENCES**

- 9  
10  
11 1. Seleem MN, Boyle SM, Sriranganathan N. Brucellosis: a re-emerging zoonosis. *Vet Microbiol*  
12 2010;**140**(3):392-98.  
13  
14  
15 2. De Massis F, Di Girolamo A, Petrini A, *et al.* Correlation between animal and human brucellosis in  
16 Italy during the period 1997–2002. *Clin Microbiol Infect* 2005;**11**(8):632-36.  
17  
18  
19 3. Marianelli C, Graziani C, Santangelo C, *et al.* Molecular epidemiological and antibiotic susceptibility  
20 characterization of *Brucella* isolates from humans in Sicily, Italy. *J Clin Microbiol*  
21 2007;**45**(9):2923-28.  
22  
23  
24 4. Memish ZA, Balkhy HH. Brucellosis and international travel. *J Travel Med* 2004;**11**(1):49-55.  
25  
26  
27 5. Wang D, Cui B, Wang Y, *et al.* Analysis on surveillance data of brucellosis in China, 2009. *Disease*  
28 *surveillance* 2010;**25**(12):944-46.  
29  
30  
31 6. Lim HS, Min YS, Lee HS. Investigation of a series of brucellosis cases in Gyeongsangbuk-do during  
32 2003-2004. *J Prev Med Public Health* 2005;**38**(4):482-88.  
33  
34  
35 7. Pappas G, Papadimitriou P, Akritidis N, *et al.* The new global map of human brucellosis. *Lancet*  
36 *Infect Dis* 2006;**6**(2):91-99.  
37  
38  
39 8. Shang D, Xiao D, Yin J. Epidemiology and control of brucellosis in China. *Vet Microbiol*  
40 2002;**90**(1):165-82.  
41  
42  
43 9. Zhang J. Reasons and prevention and control measures for the high brucellosis incidence. *Disease*  
44 *surveillance* 2010;**25**(5):341-42.  
45  
46  
47 10. Li Y, Yu X, He T. An analysis of brucellosis epidemic situation in humans from 2004 to 2010 in  
48  
49  
50  
51  
52  
53  
54  
55  
56  
57  
58  
59  
60

- 1  
2  
3  
4 China. *Chinese Journal of Control of Endemic Disenaces* 2012;**27**(1):18-20.
- 5  
6 11. Gao G, Xu J, Ke Y, *et al.* Literature analysis of brucellosis epidemic situation and research progress  
7  
8  
9 in China from 2000 to 2010. *Chinese Journal of Zoonoses* 2012;**28**(12):1178-84.
- 10  
11 12. Anselin L. Exploratory spatial data analysis and geographic information systems. *New tools for*  
12  
13  
14 *spatial analysis* 1994;19-33.
- 15  
16 13. Anselin L. Interactive techniques and exploratory spatial data analysis. *Geographical Information*  
17  
18  
19 *Systems: principles, techniques, management and applications* 1999;**1**:251-64.
- 20  
21 14. Owusu Edusei K, Owens CJ. Monitoring county-level chlamydia incidence in Texas, 2004–2005:  
22  
23  
24 application of empirical Bayesian smoothing and Exploratory Spatial Data Analysis (ESDA)  
25  
26  
27 methods. *Int J Health Geogr* 2009;**8**(1):12.
- 28  
29 15. Martins - Melo FR, Ramos AN, Alencar CH, *et al.* Mortality of Chagas' disease in Brazil: spatial  
30  
31  
32 patterns and definition of high - risk areas. *Trop Med Int Health* 2012;**17**(9):1066-75.
- 33  
34 16. Clayton D, Kaldor J. Empirical Bayes estimates of age-standardized relative risks for use in disease  
35  
36  
37 mapping. *Biometrics* 1987:671-81.
- 38  
39 17. Abdullayev R, Kracalik I, Ismayilova R, *et al.* Analyzing the spatial and temporal distribution of  
40  
41  
42 human brucellosis in Azerbaijan (1995-2009) using spatial and spatio-temporal statistics. *BMC Infect*  
43  
44  
45 *Dis* 2012;**12**(1):185.
- 46  
47 18. Wang L, Wang Y, Yang G, *et al.* China Information System for Disease Control and Prevention  
48  
49  
50 (CISDCP). <http://www.pacifichealthsummit.org/downloads/HITCaseStudies/Functional>  
51  
52  
53 /CISDCP.pdf (Accessed 26 January 2013).
- 54  
55 19. Cao M, Feng Z, Zhang J, *et al.* Contextual risk factors for regional distribution of Japanese  
56  
57  
58 encephalitis in the People's Republic of China. *Trop Med Int Health* 2010;**15**(8):918-23.
- 59  
60

- 1  
2  
3  
4 20. Yin F, Feng Z, Li X. Spatial analysis of primary and secondary syphilis incidence in China,  
5  
6 2004–2010. *Int J STD AIDS* 2012;**23**(12):870-75.  
7  
8  
9 21. Maguire DJ, Batty M, Goodchild MF. GIS, spatial analysis and modelling. *ESRI, Redlands, CA*,  
10  
11 2005:93–111.  
12  
13 22. Anselin L, Lozano N, Koschinsky J. Rate transformations and smoothing. *Urbana* 2006;**51**:61801.  
14  
15 23. Anselin L. Exploring spatial data with GeoDaTM: a workbook. *Urbana* 2004;**51**:61801.  
16  
17 24. Anselin L, Syabri I, Kho Y. GeoDa: an introduction to spatial data analysis. *Geographical analysis*  
18  
19 2006;**38**(1):5-22.  
20  
21  
22 25. Anselin L. Local indicators of spatial association—LISA. *Geographical analysis* 1995;**27**(2):93-115  
23  
24  
25 26. Fang L, Yan L, Liang S, et al. Spatial analysis of hemorrhagic fever with renal syndrome in China.  
26  
27  
28 *BMC Infect Dis* 2006;**6**(1):77.  
29  
30  
31 27. Dewan AM, Corner R, Hashizume M, et al. Typhoid Fever and Its Association with Environmental  
32  
33 Factors in the Dhaka Metropolitan Area of Bangladesh: A Spatial and Time-Series Approach. *PLoS*  
34  
35 *Negl Trop Dis* 2013;**7**(1):e1998.  
36  
37  
38 28. Fosgate GT, Carpenter TE, Chomel BB, et al. Time-space clustering of human brucellosis, California,  
39  
40 1973-1992. *Emerg Infect Dis* 2002;**8**(7):672-78.  
41  
42  
43 29. Zhong Z, Yu S, Wang X, et al. Human brucellosis in the People's Republic of China during  
44  
45 2005-2010. *Int J Infect Dis* 2013:289-92.  
46  
47  
48 30. Al-Shamahy H, Whitty C, Wright S. Risk factors for human brucellosis in Yemen: a case control  
49  
50 study. *Epidemiol Infect* 2000;**125**(2):309-13.  
51  
52  
53 31. Chen Z, Zhang W, Ke Y, et al. High-Risk Regions of Human Brucellosis in China: Implications for  
54  
55 Prevention and Early Diagnosis of Travel-Related Infections. *Clin Infect Dis* 2013;**57**(2):330-32.  
56  
57  
58  
59  
60

1  
2  
3  
4  
5  
6  
7  
8  
9  
10  
11  
12  
13  
14  
15  
16  
17  
18  
19  
20  
21  
22  
23  
24  
25  
26  
27  
28  
29  
30  
31  
32  
33  
34  
35  
36  
37  
38  
39  
40  
41  
42  
43  
44  
45  
46  
47  
48  
49  
50  
51  
52  
53  
54  
55  
56  
57  
58  
59  
60

32. Jackson MC, Huang L, Luo J, *et al.* Comparison of tests for spatial heterogeneity on data with global clustering patterns and outliers. *Int J Health Geogr* 2009;**8**(1):55.

For peer review only

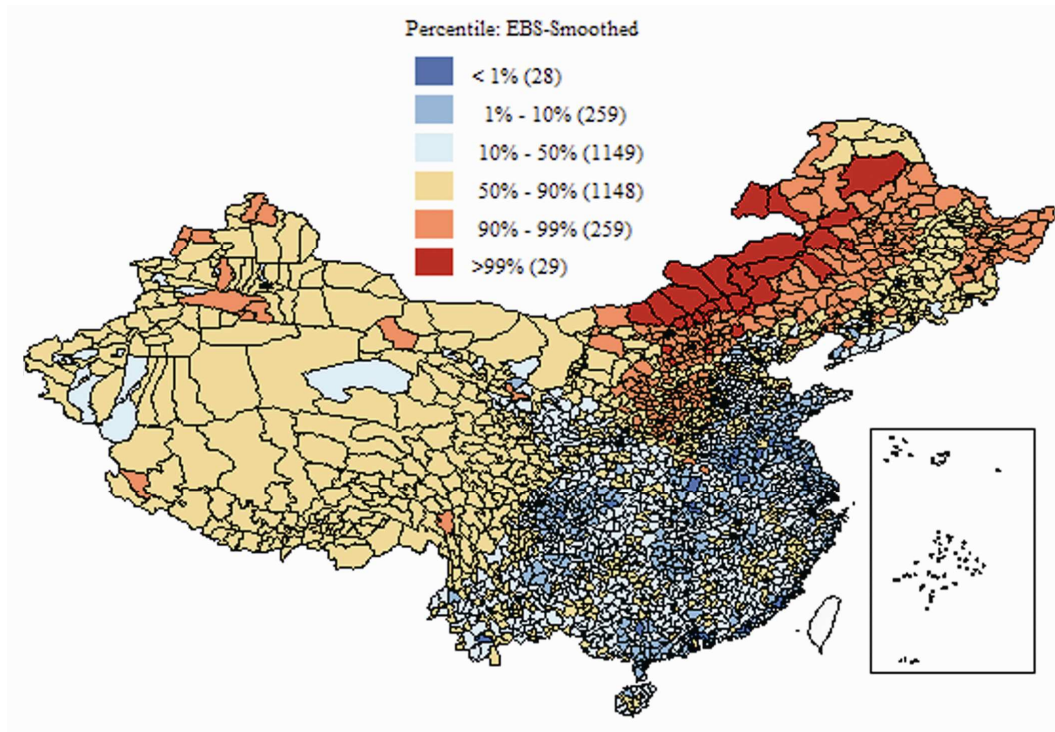

Figure 1 Percentile map of annual EB smoothed incidence rates for human brucellosis in mainland China by county, 2004-2010

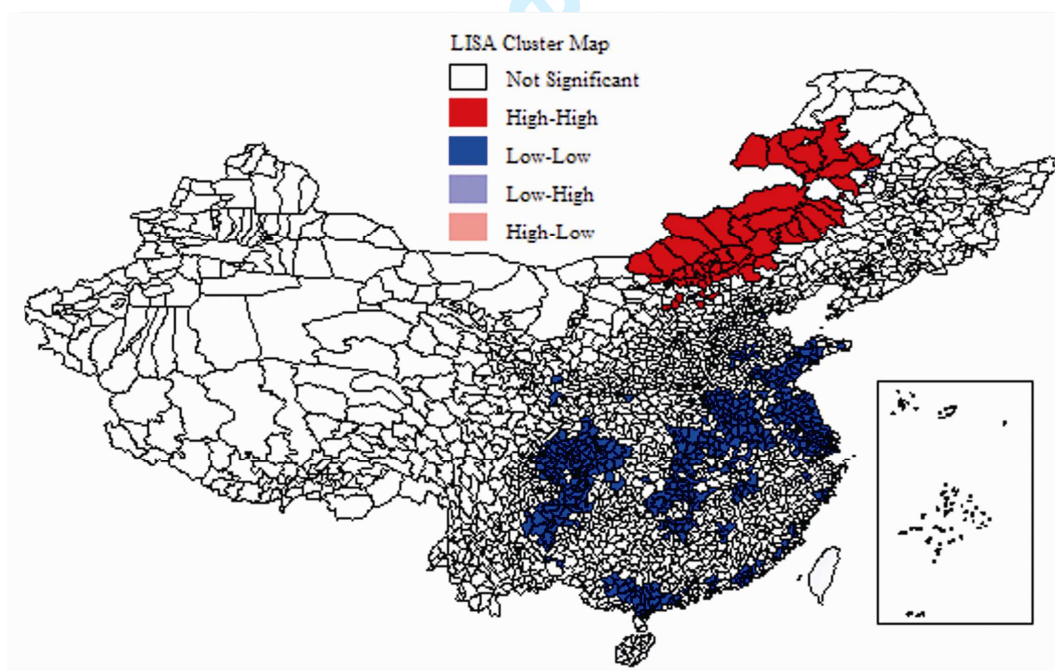

Figure 2 LISA cluster map of annual EB smoothed incidence rates for human brucellosis in mainland China by county, 2004-2010

1  
2  
3  
4  
5  
6  
7  
8  
9  
10  
11  
12  
13  
14  
15  
16  
17  
18  
19  
20  
21  
22  
23  
24  
25  
26  
27  
28  
29  
30  
31  
32  
33  
34  
35  
36  
37  
38  
39  
40  
41  
42  
43  
44  
45  
46  
47  
48  
49  
50  
51  
52  
53  
54  
55  
56  
57  
58  
59  
60

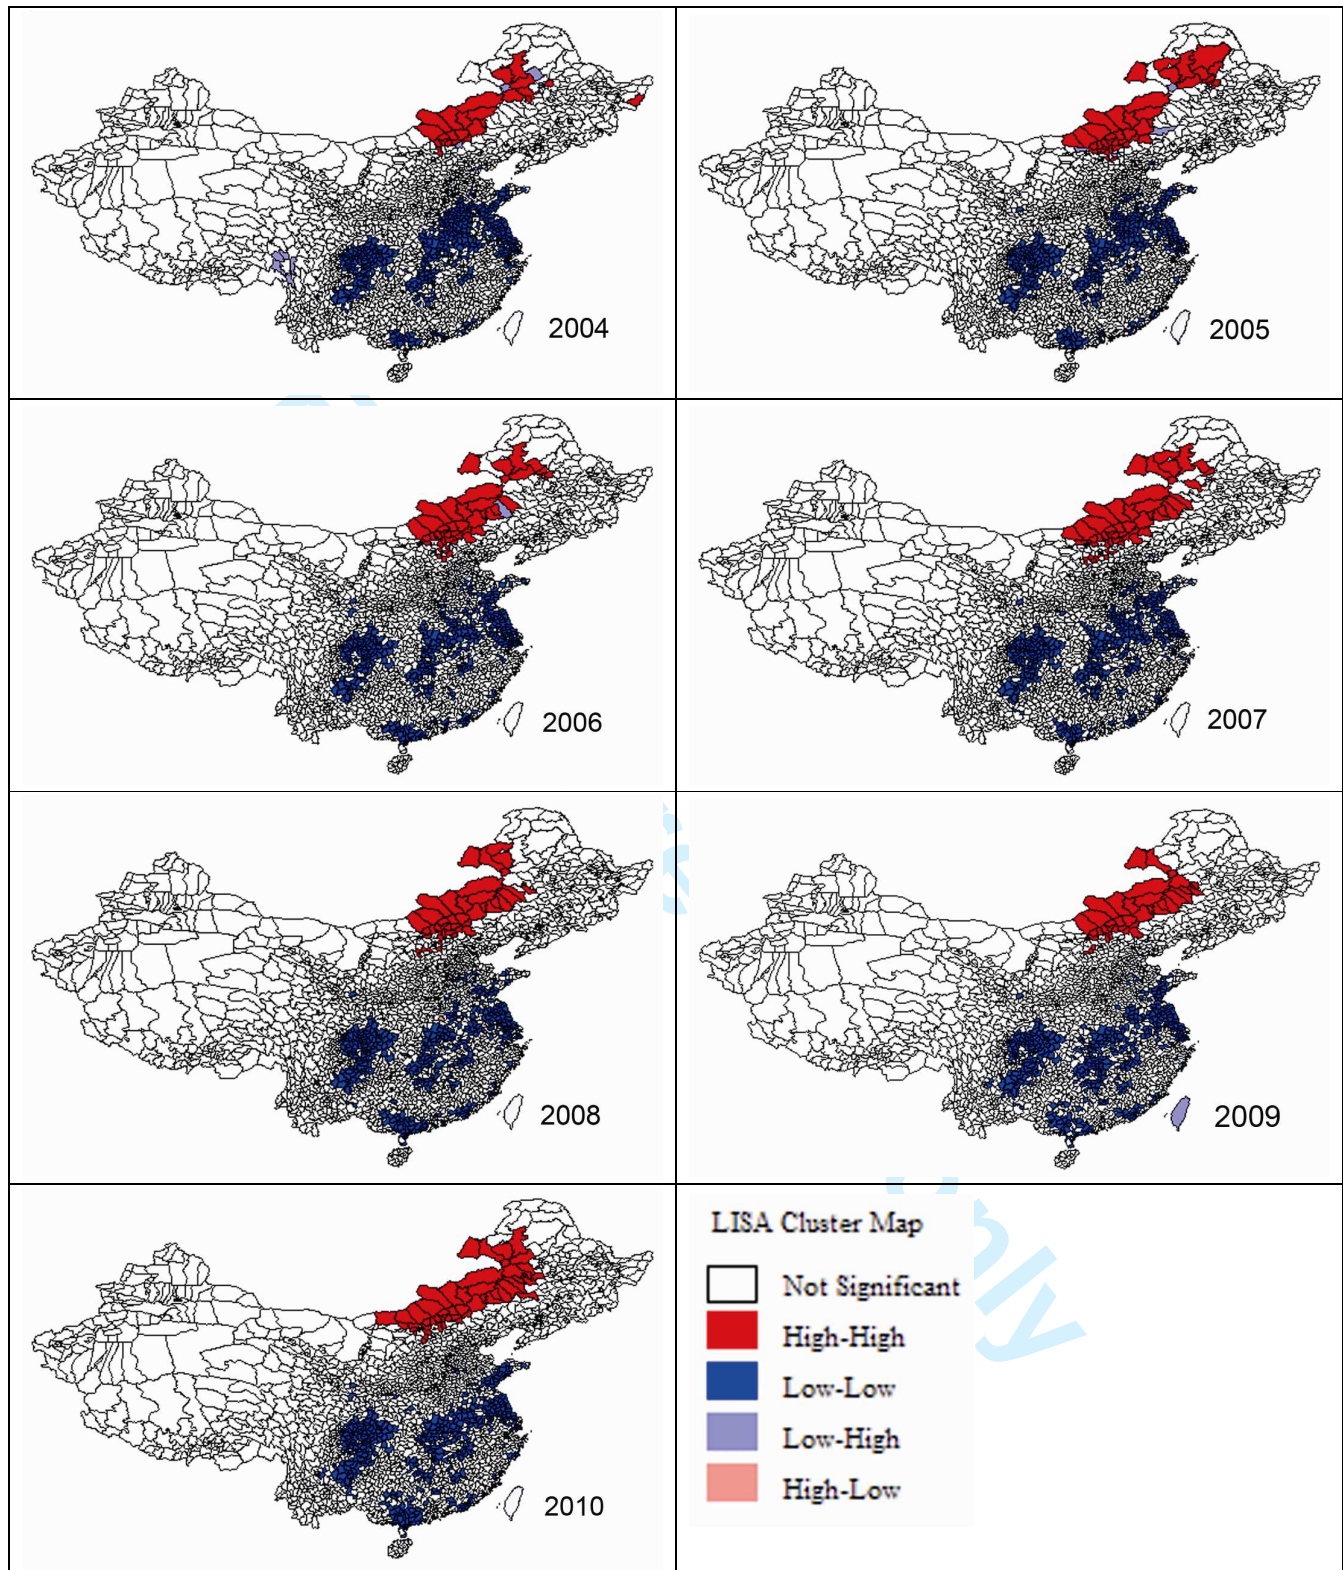

Figure 3 LISA cluster maps of EB smoothed incidence rates for human brucellosis in mainland China by county (per year), 2004-2010



## Figure legends

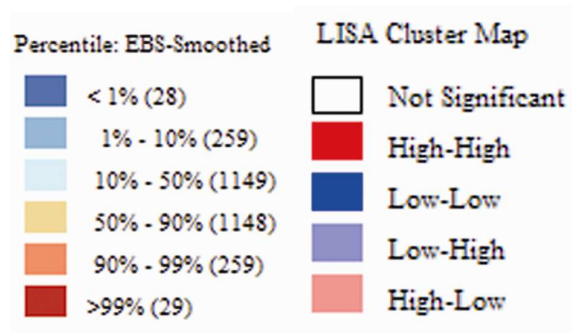

For peer review only

1  
2  
3  
4  
5  
6  
7  
8  
9  
10  
11  
12  
13  
14  
15  
16  
17  
18  
19  
20  
21  
22  
23  
24  
25  
26  
27  
28  
29  
30  
31  
32  
33  
34  
35  
36  
37  
38  
39  
40  
41  
42  
43  
44  
45  
46  
47  
48  
49  
50  
51  
52  
53  
54  
55  
56  
57  
58  
59  
60

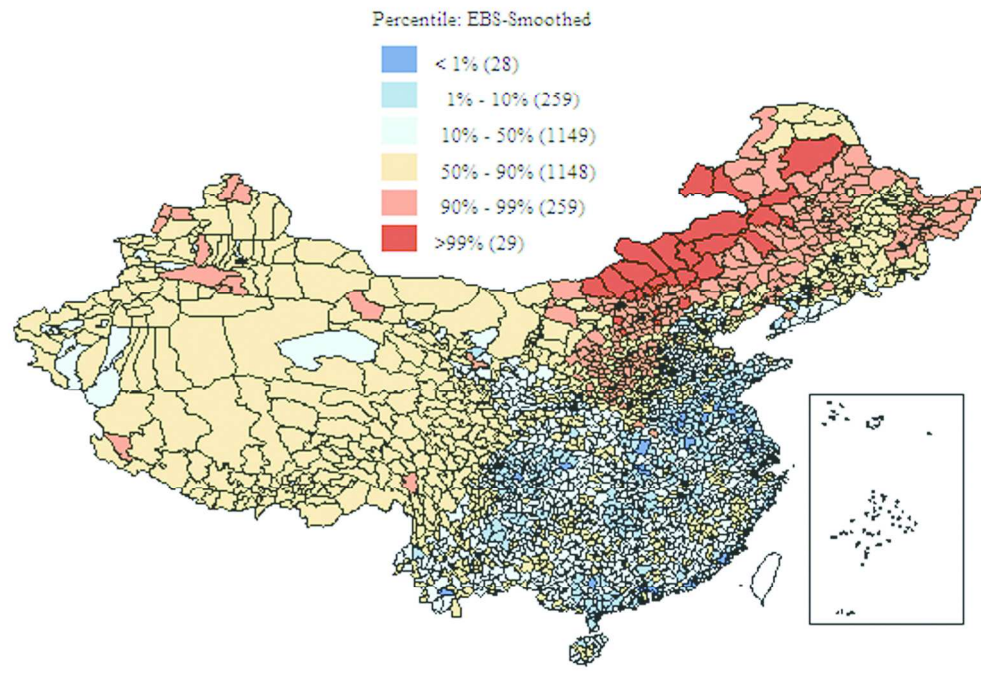

180x123mm (300 x 300 DPI)

view only

1  
2  
3  
4  
5  
6  
7  
8  
9  
10  
11  
12  
13  
14  
15  
16  
17  
18  
19  
20  
21  
22  
23  
24  
25  
26  
27  
28  
29  
30  
31  
32  
33  
34  
35  
36  
37  
38  
39  
40  
41  
42  
43  
44  
45  
46  
47  
48  
49  
50  
51  
52  
53  
54  
55  
56  
57  
58  
59  
60

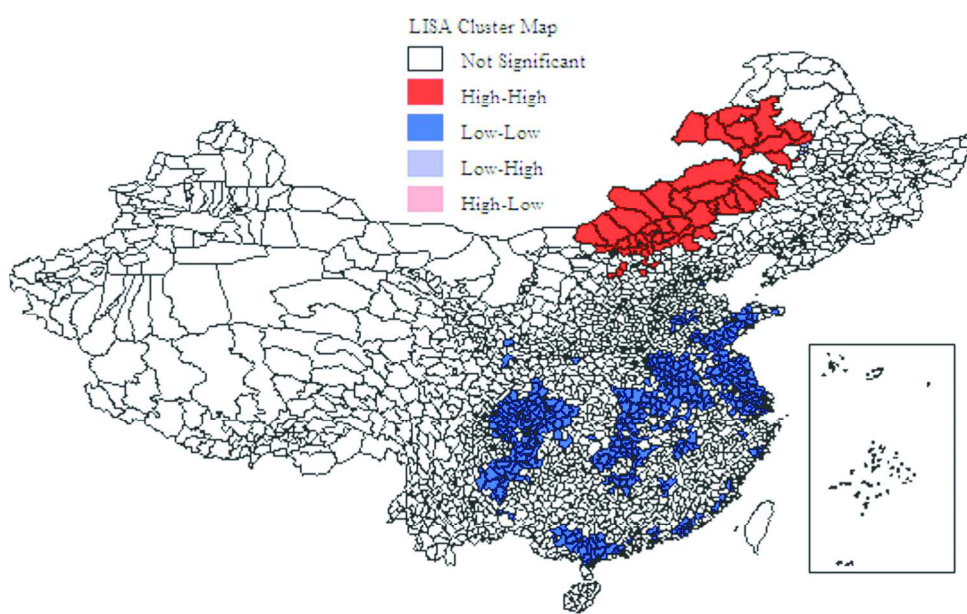

180x113mm (300 x 300 DPI)

review only

1  
2  
3  
4  
5  
6  
7  
8  
9  
10  
11  
12  
13  
14  
15  
16  
17  
18  
19  
20  
21  
22  
23  
24  
25  
26  
27  
28  
29  
30  
31  
32  
33  
34  
35  
36  
37  
38  
39  
40  
41  
42  
43  
44  
45  
46  
47  
48  
49  
50  
51  
52  
53  
54  
55  
56  
57  
58  
59  
60

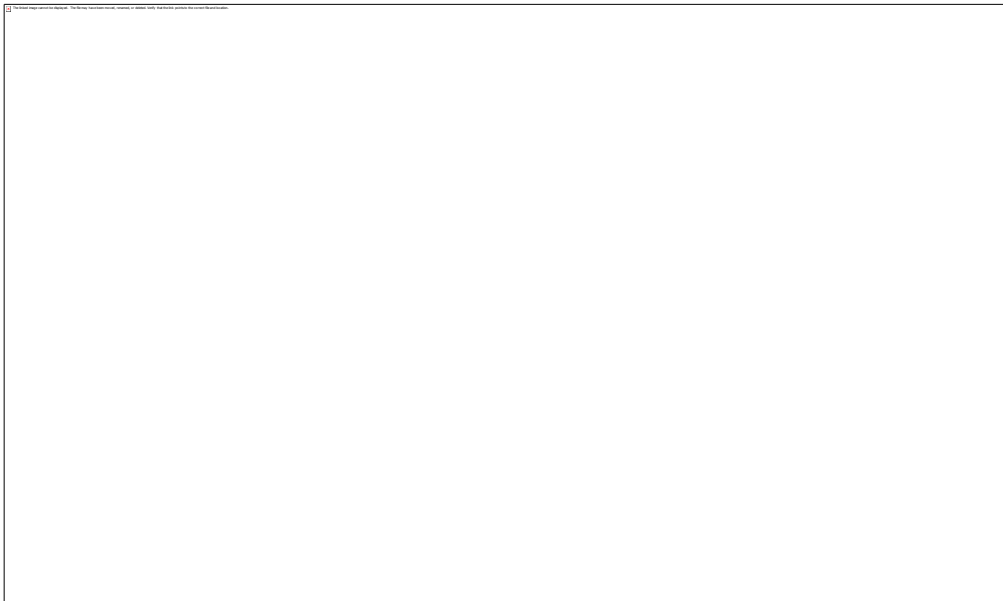

90x53mm (300 x 300 DPI)

review only

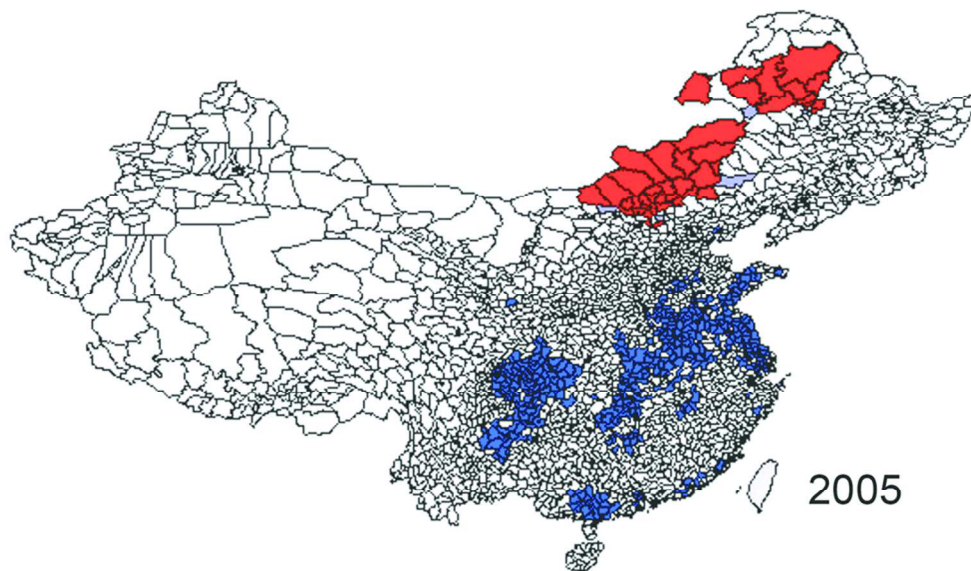

90x52mm (300 x 300 DPI)

review only

1  
2  
3  
4  
5  
6  
7  
8  
9  
10  
11  
12  
13  
14  
15  
16  
17  
18  
19  
20  
21  
22  
23  
24  
25  
26  
27  
28  
29  
30  
31  
32  
33  
34  
35  
36  
37  
38  
39  
40  
41  
42  
43  
44  
45  
46  
47  
48  
49  
50  
51  
52  
53  
54  
55  
56  
57  
58  
59  
60

1  
2  
3  
4  
5  
6  
7  
8  
9  
10  
11  
12  
13  
14  
15  
16  
17  
18  
19  
20  
21  
22  
23  
24  
25  
26  
27  
28  
29  
30  
31  
32  
33  
34  
35  
36  
37  
38  
39  
40  
41  
42  
43  
44  
45  
46  
47  
48  
49  
50  
51  
52  
53  
54  
55  
56  
57  
58  
59  
60

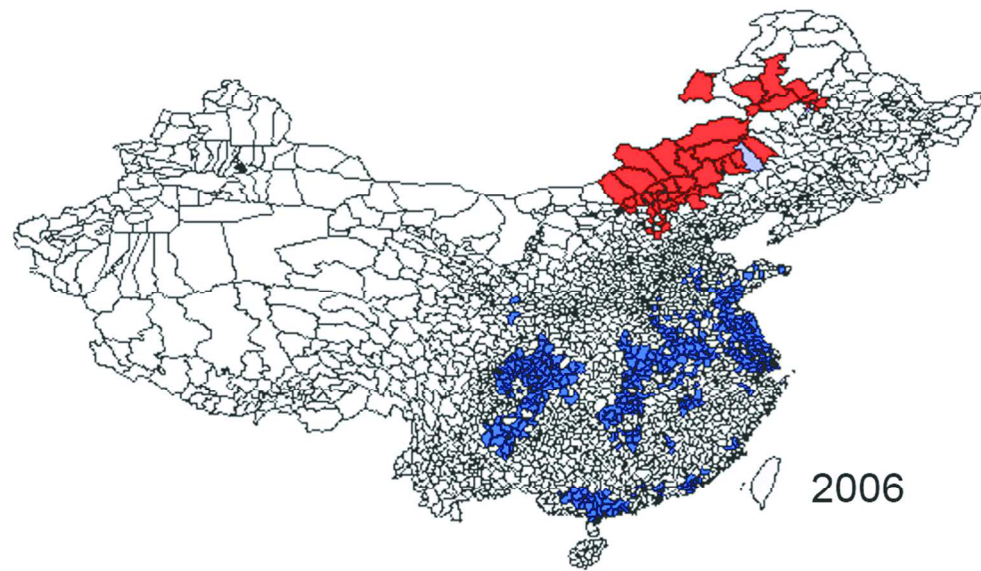

90x53mm (300 x 300 DPI)

review only

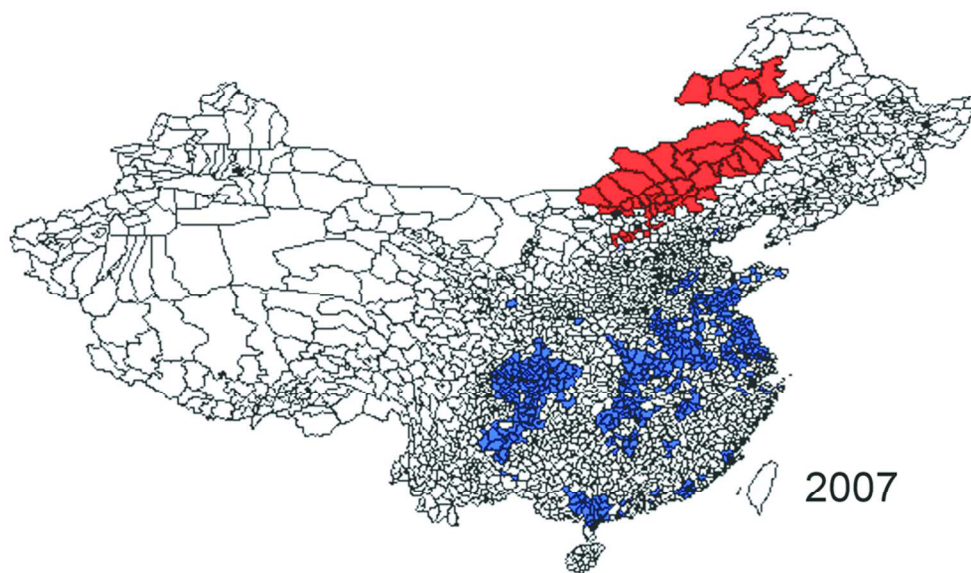

90x53mm (300 x 300 DPI)

review only

1  
2  
3  
4  
5  
6  
7  
8  
9  
10  
11  
12  
13  
14  
15  
16  
17  
18  
19  
20  
21  
22  
23  
24  
25  
26  
27  
28  
29  
30  
31  
32  
33  
34  
35  
36  
37  
38  
39  
40  
41  
42  
43  
44  
45  
46  
47  
48  
49  
50  
51  
52  
53  
54  
55  
56  
57  
58  
59  
60

1  
2  
3  
4  
5  
6  
7  
8  
9  
10  
11  
12  
13  
14  
15  
16  
17  
18  
19  
20  
21  
22  
23  
24  
25  
26  
27  
28  
29  
30  
31  
32  
33  
34  
35  
36  
37  
38  
39  
40  
41  
42  
43  
44  
45  
46  
47  
48  
49  
50  
51  
52  
53  
54  
55  
56  
57  
58  
59  
60

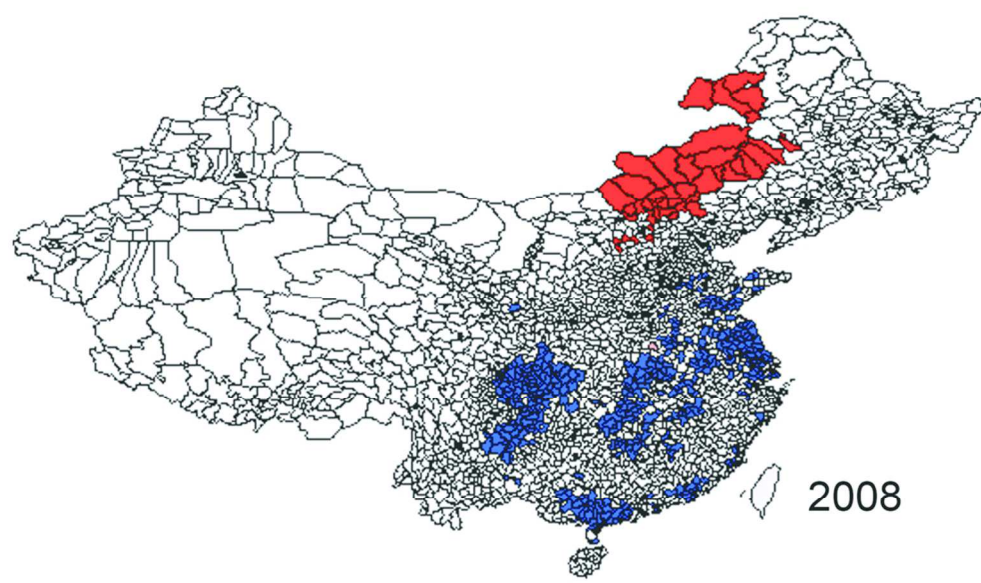

90x54mm (300 x 300 DPI)

review only



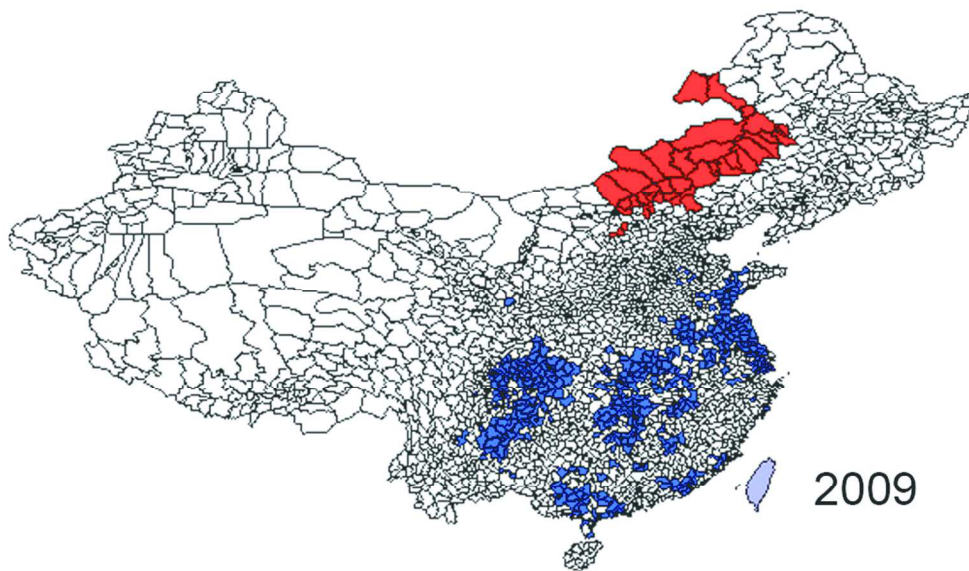

90x53mm (300 x 300 DPI)

review only

1  
2  
3  
4  
5  
6  
7  
8  
9  
10  
11  
12  
13  
14  
15  
16  
17  
18  
19  
20  
21  
22  
23  
24  
25  
26  
27  
28  
29  
30  
31  
32  
33  
34  
35  
36  
37  
38  
39  
40  
41  
42  
43  
44  
45  
46  
47  
48  
49  
50  
51  
52  
53  
54  
55  
56  
57  
58  
59  
60

1  
2  
3  
4  
5  
6  
7  
8  
9  
10  
11  
12  
13  
14  
15  
16  
17  
18  
19  
20  
21  
22  
23  
24  
25  
26  
27  
28  
29  
30  
31  
32  
33  
34  
35  
36  
37  
38  
39  
40  
41  
42  
43  
44  
45  
46  
47  
48  
49  
50  
51  
52  
53  
54  
55  
56  
57  
58  
59  
60

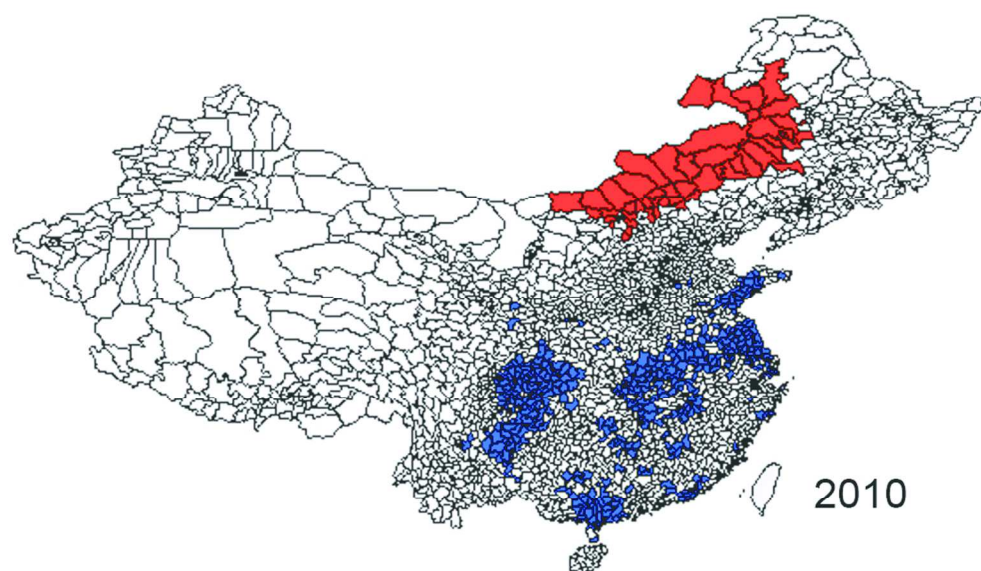

90x54mm (300 x 300 DPI)

review only



**Spatial analysis on human brucellosis incidence in mainland  
China: 2004-2010**

|                                 |                                                                                                                                                                                                                                                                                                                                                                                                                                                                                                                                                      |
|---------------------------------|------------------------------------------------------------------------------------------------------------------------------------------------------------------------------------------------------------------------------------------------------------------------------------------------------------------------------------------------------------------------------------------------------------------------------------------------------------------------------------------------------------------------------------------------------|
| Journal:                        | <i>BMJ Open</i>                                                                                                                                                                                                                                                                                                                                                                                                                                                                                                                                      |
| Manuscript ID:                  | bmjopen-2013-004470.R1                                                                                                                                                                                                                                                                                                                                                                                                                                                                                                                               |
| Article Type:                   | Research                                                                                                                                                                                                                                                                                                                                                                                                                                                                                                                                             |
| Date Submitted by the Author:   | 15-Feb-2014                                                                                                                                                                                                                                                                                                                                                                                                                                                                                                                                          |
| Complete List of Authors:       | Zhang, Junhui; Sichuan University, West China School of Public Health; Luzhou Medical College, School of Public Health<br>Yin, Fei; Sichuan University, West China School of Public Health<br>Zhang, Tao; Sichuan University, West China School of Public Health<br>Yang, Chao; Luzhou Medical College, School of Public Health<br>Zhang, Xingyu; Sichuan University, West China School of Public Health<br>Feng, Zijian; Chinese Center for Disease Control and Prevention,<br>Li, Xiaosong; Sichuan University, West China School of Public Health |
| <b>Primary Subject Heading</b>: | Epidemiology                                                                                                                                                                                                                                                                                                                                                                                                                                                                                                                                         |
| Secondary Subject Heading:      | Public health, Infectious diseases                                                                                                                                                                                                                                                                                                                                                                                                                                                                                                                   |
| Keywords:                       | Human brucellosis, exploratory spatial data analysis, empirical Bayes smoothing, spatial autocorrelation, cluster detection                                                                                                                                                                                                                                                                                                                                                                                                                          |
|                                 |                                                                                                                                                                                                                                                                                                                                                                                                                                                                                                                                                      |

SCHOLARONE™  
Manuscripts

1  
2  
3  
4  
5  
6  
7  
8  
9  
10  
11  
12  
13  
14  
15  
16  
17  
18  
19  
20  
21  
22  
23  
24  
25  
26  
27  
28  
29  
30  
31  
32  
33  
34  
35  
36  
37  
38  
39  
40  
41  
42  
43  
44  
45  
46  
47  
48  
49  
50  
51  
52  
53  
54  
55  
56  
57  
58  
59  
60

**Article type: research paper**

**Spatial analysis on human brucellosis incidence in  
mainland China: 2004-2010**

Junhui Zhang,<sup>1,2#</sup> Fei Yin,<sup>1#</sup> Tao Zhang,<sup>1</sup> Chao Yang,<sup>2</sup> Xingyu Zhang,<sup>1</sup> Zijian

Feng,<sup>3</sup> Xiaosong Li<sup>1\*</sup>

1 West China School of Public Health, Sichuan University, Chengdu 610041, PR  
China

2 School of Public Health, Luzhou Medical College, Luzhou 646000, PR China

3 Chinese Center for Disease Control and Prevention, Beijing 102206, PR China

\*Correspondence to: Professor Xiaosong Li, Department of Medical Statistics,  
West China School of Public Health, Sichuan University, No.17 Section 3, South  
Renmin Road, Chengdu 610041, PR China. Tel: +86 18608021962

Email address: lixiaosong1019@163.com

# These authors contributed equally to this work

## ABSTRACT

**Objectives:** China has experienced a sharply increasing rate of human brucellosis in recent years. Effective spatial monitoring of human brucellosis incidence is very important for successful implementation of control and prevention programs. The purpose of this paper is to apply exploratory spatial data analysis (ESDA) methods and the empirical Bayes (EB) smoothing technique to monitor county-level incidence rates for human brucellosis in mainland China from 2004 to 2010 by examining spatial patterns.

**Methods:** ESDA methods were used to characterize spatial patterns of EB smoothed incidence rates for human brucellosis based on county-level data obtained from the China Information System for Disease Control and Prevention (CISDCP) in mainland China from 2004 to 2010.

**Results:** EB smoothed incidence rates for human brucellosis were spatially dependent during 2004-2010. The local Moran test identified significantly high-risk clusters of human brucellosis (all P-values <0.01), which persisted during the seven-year study period. High-risk counties were centered in Inner Mongolia Autonomous Region and other Northern provinces (i.e., Hebei, Shanxi, Jilin and Heilongjiang provinces) around the border with Inner Mongolia Autonomous Region where animal husbandry was highly developed. The number of high-risk counties increased from 25 in 2004 to 54 in 2010.

**Conclusions:** ESDA methods and the EB smoothing technique can assist public health officials in identifying high-risk areas. Allocating more resources to

high-risk areas is an effective way to reduce human brucellosis incidence.

**Keywords:** *Human brucellosis, exploratory spatial data analysis, empirical*

*Bayes smoothing, spatial autocorrelation, cluster detection*

**Word Count:** 3208

## ARTICLE SUMMARY

### Article focus

- The incidence rates of human brucellosis are not distributed evenly across regions in China. Awareness of the spatial patterns of human brucellosis is quite beneficial for the prevention and control of the disease.
- ESDA methods and the empirical Bayes smoothing technique are commonly combined to characterize spatial epidemiology of diseases.

### Key messages

- EB smoothed incidence rates for human brucellosis were spatially dependent during 2004-2010. The local Moran test identified significantly high-risk clusters of human brucellosis, which persisted during the seven-year study period.
- High-risk counties were centered in Inner Mongolia Autonomous Region and other Northern provinces around the border with Inner Mongolia Autonomous Region where animal husbandry was highly developed.
- ESDA methods and the EB smoothing technique can assist public health

officials in identifying high-risk areas.

### Strengths and limitations of this study

- ESDA methods and the EB smoothing technique were used to analyze spatial patterns of incidence rates for human brucellosis at the county level in mainland China. Therefore, random variability was reduced, and greater stability of incidence rates was provided mainly in small counties and true cluster areas with low false-positive rates especially performing well on outlier detection had a better chance of being detected.
- The number of reported cases of human brucellosis obtained from the CISDCP system might be only part of the actual incidence of human brucellosis across the country as human brucellosis is often underreported or misdiagnosed.
- Our analyses are based on county-level data. Smaller spatial units might provide more location-specific information about the design and implementation stages of public health programs.

### INTRODUCTION

Brucellosis, caused by *Brucella* species, is a zoonotic disease recognized as an emerging and re-emerging threat to public and veterinary health.[1] The disease is transmitted to humans by direct/indirect contact with infected animals or through the consumption of contaminated foods.[2-4] People with occupational exposure are at highest risk for brucellosis, in particular those performing husbandry activities, butchering, and livestock trading.[5 6] Worldwide economic

1  
2  
3  
4 losses caused by brucellosis are extensive not only in animal production but also  
5  
6 in public health.[1] Although brucellosis has been eradicated from many  
7  
8 industrialized countries, new foci of disease continually appear, particularly in  
9  
10 parts of Asia.[7]

11  
12  
13 Brucellosis is classified as one of the Class II national notifiable diseases by the  
14  
15 Centers for Disease Control and Prevention (CDC) and as a key disease in  
16  
17 Class II by the Implement Detailed Rules of the By-law  
18  
19 on Disease Prevention and Control of Livestock and Poultry in mainland  
20  
21 China.[8] The disease was first reported in China in 1905.[8] Human brucellosis  
22  
23 incidence was quite severe before 1980s in the country, later decreased and  
24  
25 remained at a low level. From 1995 to 2001, the incidence of human brucellosis  
26  
27 increased rapidly, and spread more than 10 provinces.[8] In recent years, With  
28  
29 the rapid development of China's animal husbandry, human brucellosis  
30  
31 incidence had increased sharply.[9] Nationwide surveillance data indicated that  
32  
33 the total incidence rate of human brucellosis in mainland China increased from  
34  
35 0.92 cases per 100,000 people in 2004 to 2.62 cases per 100,000 people in  
36  
37 2010.[10] Currently, human brucellosis is considered an important public health  
38  
39 problem in mainland China.[11]

40  
41  
42 The incidence rates of human brucellosis are not distributed evenly across  
43  
44 regions in China.[10] Awareness of the spatial patterns of human brucellosis is  
45  
46 quite beneficial for the prevention and control of the disease. Exploratory spatial  
47  
48 data analysis (ESDA) methods are emerging useful approaches to achieve this  
49  
50  
51  
52  
53  
54  
55  
56  
57  
58  
59  
60



1  
2  
3  
4 understanding.[12] ESDA is a set of techniques used to describe and visualize  
5  
6 spatial distributions, identify atypical locations or spatial outliers, discover  
7  
8 patterns of spatial association, clusters or hot spots, and suggest spatial regimes  
9  
10 or other forms of spatial heterogeneity.[12 13] The methods can be applied by  
11  
12 health officials to monitor spatial variations in disease rates, which can assist  
13  
14 health officials in designing more location-specific control and prevention  
15  
16 programs by taking into account global and local spatial influences.[14]  
17  
18 Measures of spatial autocorrelation are at the core of ESDA methods.[13] ESDA  
19  
20 methods and the empirical Bayes (EB) smoothing technique are commonly  
21  
22 combined to characterize spatial epidemiology of diseases.[14-17] The EB  
23  
24 smoothing technique is used to reduce random variation and to provide greater  
25  
26 stability of rates mainly in small areas associated with small populations.[16]  
27  
28 The primary purpose of this paper is to apply ESDA methods and the EB  
29  
30 smoothing technique to monitor county-level incidence rates for human  
31  
32 brucellosis in mainland China from 2004 to 2010 by examining spatial patterns.  
33  
34 We also identified the potential presence of clusters of the disease in mainland  
35  
36 China, thus to provide spatial guidance for future research.  
37  
38  
39  
40  
41  
42  
43  
44  
45

## 46 **METHODS**

### 47 **Data source**

48  
49 Human brucellosis cases including 2872 counties in mainland China from 2004  
50  
51 to 2010 were collected through the Internet-based disease-reporting system  
52  
53 (China Information System for Disease Control and Prevention, CISDCP), which  
54  
55  
56  
57  
58  
59  
60

1  
2  
3 was established in 2004 and was more integrated, effective, and reliable than  
4  
5  
6 the previous case-reporting system.[18 19] In mainland China, human  
7  
8  
9 brucellosis is a reportable disease. Suspected or confirmed cases must be  
10  
11 reported to local and provincial Centers for Disease Control and Prevention  
12  
13 (CDC) and then to Chinese CDC (CCDC). To meet case definitions, disease in  
14  
15 persons must be accompanied by clinical signs and must be confirmed by  
16  
17 serologic tests or isolation in accordance with the case definition of the World  
18  
19 Health Organization.[20]  
20  
21

22  
23 In this paper, the incidence rates of human brucellosis in fact referred to the  
24  
25 reported incidence rates. In order to conduct a geographic information system  
26  
27 (GIS) -based analysis of the spatial distribution of human brucellosis, the  
28  
29 county-level polygon map at a 1:1,000,000 scale was obtained.[21]  
30  
31

32  
33 Demographic information from 2004 to 2010 was acquired from the National  
34  
35 Bureau of Statistics of China. All human brucellosis cases were geocoded and  
36  
37 matched to the county-level layers of the polygons by administrative code using  
38  
39 the software Mapinfo7.0.[21]  
40  
41

#### 42 43 **EB smoothing technique**

44  
45 When raw rates derived from different counties across the whole study area are  
46  
47 applied to estimate the underlying disease risk, differences in population size  
48  
49 result in variance instability and spurious outliers. This is because the rates  
50  
51 observed in areas with small populations may be highly unstable in that the  
52  
53 addition or deletion of one or two cases can cause drastic changes in the  
54  
55  
56  
57  
58  
59  
60

1  
2  
3  
4 observed values. Therefore, raw rates may not fully represent the relative  
5  
6 magnitude of the underlying risks if compared with other counties with high  
7  
8 population base. To overcome this problem, the EB smoothing technique  
9  
10 proposed by Clayton and Kaldor[16] was applied to our brucellosis data. This  
11  
12 method adjusts raw rates by incorporating data from other neighbouring spatial  
13  
14 units.[22] Essentially, raw rates get 'shrunk' towards an overall mean which is an  
15  
16 inverse function of the variance. Application of EB smoothed incidence rate not  
17  
18 only provides better visualization compared with raw rate but also serves to find  
19  
20 true outliers.[23]

### 25 26 **Spatial autocorrelation analysis**

27  
28 We performed spatial autocorrelation analysis in GeoDa0.9.5-i software.[24]  
29  
30 Both global and local Moran's I statistics were calculated. The global Moran's I  
31  
32 statistic was estimated to assess the evidence of global spatial autocorrelation  
33  
34 (clustering) of incidence rates over the study region.[25] Anselin's local Moran's I  
35  
36 (LISA) statistic indicates the location of local clusters and spatial outliers.[26]  
37  
38 Spatial autocorrelation statistics for human brucellosis incidence rates were  
39  
40 calculated based on the assumption of constant variance. The assumption might  
41  
42 be violated when incidence rates at the county level varied greatly across the  
43  
44 whole study region.[27] The EB smoothing technique was performed to adjust  
45  
46 for this violation. The standardized first-order contiguity Queen neighbours were  
47  
48 used as the criteria for identifying neighbors in this paper. A significant test was  
49  
50 performed through the permutation test, and a reference distribution was  
51  
52  
53  
54  
55  
56  
57  
58  
59  
60

1  
2  
3  
4 generated under an assumption that the incidence was randomly distributed. In  
5  
6 order to obtain more robust results, the number of permutation test was set to  
7  
8 9999. Since multiple comparisons increased the chances of identifying  
9  
10 overlapping clusters, the significance level was set at 0.01. Based on these  
11  
12 permutations and threshold, we have plotted values on a map to display the  
13  
14 location of human brucellosis clusters in mainland China.[28]  
15  
16  
17

## 18 **RESULTS**

### 19 **Annualized average of human brucellosis from 2004 to 2010**

20  
21 A total of 164,752 human brucellosis cases were reported in mainland China  
22  
23 from 2004 to 2010. Annual EB smoothed incidence rates for human brucellosis  
24  
25 from 2004 to 2010. Annual EB smoothed incidence rates for human brucellosis  
26  
27 for all 2872 counties were calculated. Table 1 presents annual EB smoothed  
28  
29 incidence rates for human brucellosis over 100 cases per 100, 000 people in 28  
30  
31 counties, which accounted for 34.41% of all cases in the country during the  
32  
33 study period. Inner Mongolia Autonomous Region had the highest number of 23,  
34  
35 centered in Xilin Gol League, Ulanqab League, Hulunbeier City, Xing'an League,  
36  
37 Baotou City, Chifeng City, Hohhot City, and Tongliao City.  
38  
39

40  
41 Summary statistics for the annual EB smoothed incidence rates for all counties  
42  
43 were calculated. The mean and standard deviation were 4.64 and 38.66,  
44  
45 respectively, per 100,000 people. The statistic for outliers was the computed  
46  
47 z-value, which was the difference between the observed and expected mean of  
48  
49 the annual EB smoothed incidence rates standardized by the standard deviation.  
50  
51 Thus, it had a mean of zero and a standard deviation of 1. Sunitezuo Banner in  
52  
53  
54  
55  
56  
57  
58  
59  
60

1  
2  
3  
4 Xilin Gol League in Inner Mongolia had the highest annual EB smoothed  
5  
6 incidence rate of 1209.60, with 31.16 standard deviations from the mean. All 28  
7  
8 counties were at least 2.59 standard deviations from the mean, as shown in  
9  
10  
11 Table 1.  
12  
13  
14  
15  
16  
17  
18  
19  
20  
21  
22  
23  
24  
25  
26  
27  
28  
29  
30  
31  
32  
33  
34  
35  
36  
37  
38  
39  
40  
41  
42  
43  
44  
45  
46  
47  
48  
49  
50  
51  
52  
53  
54  
55  
56  
57  
58  
59  
60

For peer review only

Table 1 Counties with annual EB smoothed incidence rates of human brucellosis over 100 per 100, 000 in mainland China, 2004–2010

| No. | Province     | City                | County                            | Rate*   | Z-value | P-value | Rank |
|-----|--------------|---------------------|-----------------------------------|---------|---------|---------|------|
| 1   | Inner        | Xilin Gol           | Sunitezuo Banner                  | 1209.60 | 31.16   | <0.001  | 1    |
| 2   | Mongolia     | League              | Abag Banner                       | 1004.10 | 25.85   | <0.001  | 2    |
| 3   |              |                     | Bordered Yellow Banner            | 826.90  | 21.27   | <0.001  | 3    |
| 4   |              |                     | Plain Blue Banner                 | 364.40  | 9.30    | <0.001  | 4    |
| 5   |              |                     | Zhenxianghuang Banner             | 303.70  | 7.73    | <0.001  | 5    |
| 6   |              |                     | Sunite Right Banner               | 294.60  | 7.50    | <0.001  | 6    |
| 7   |              |                     | west ujimqin banner               | 243.50  | 6.18    | <0.001  | 9    |
| 8   |              |                     | Xilinhot City                     | 236.80  | 6.00    | <0.001  | 10   |
| 9   |              |                     | East Ujumqin Banner               | 219.00  | 5.54    | <0.001  | 11   |
| 10  |              |                     | Duolun County                     | 176.70  | 4.45    | <0.001  | 15   |
| 11  |              | Ulanqab             | Siziwang Banner                   | 257.90  | 6.55    | <0.001  | 7    |
| 12  |              | League              | Huade County                      | 179.00  | 4.51    | <0.001  | 14   |
| 13  |              |                     | Qahar Right Wing<br>Rear Banner   | 163.90  | 4.12    | <0.001  | 16   |
| 14  |              |                     | Shangdu County                    | 142.40  | 3.56    | <0.001  | 20   |
| 15  |              |                     | Chahar Right Middle<br>Banner     | 128.80  | 3.21    | <0.002  | 23   |
| 16  |              | Hulunbeier<br>City  | New Barhu Right<br>Banner         | 255.10  | 6.48    | <0.001  | 8    |
| 17  |              |                     | New Barhu Left<br>Banner          | 203.40  | 5.14    | <0.001  | 13   |
| 18  |              |                     | Zhalantun City                    | 144.20  | 3.61    | <0.001  | 19   |
| 19  |              | Xing'an League      | Horqin Right Wing<br>Front Banner | 146.00  | 3.66    | <0.001  | 18   |
| 20  |              | Baotou City         | Daerhanmaomingan<br>Union Banner  | 129.80  | 3.24    | <0.002  | 22   |
| 21  |              | Chifeng City        | Keshiketeng Banner                | 126.50  | 3.15    | <0.002  | 24   |
| 22  |              | Hohhot City         | Qingshuihe County                 | 123.90  | 3.08    | <0.005  | 25   |
| 23  |              | Tongliao City       | Jarud Banner                      | 104.90  | 2.59    | <0.010  | 28   |
| 24  | Shanxi       | Datong City         | Tianzhen County                   | 162.30  | 4.08    | <0.001  | 17   |
| 25  |              |                     | Guangling County                  | 136.50  | 3.41    | <0.001  | 21   |
| 26  |              | Xinzhou City        | Shengchi County                   | 107.70  | 2.67    | <0.010  | 27   |
| 27  | Heilongjiang | Qiqihar City        | Meris Daur District               | 208.10  | 5.26    | <0.001  | 12   |
| 28  | Hebei        | Zhangjiakou<br>City | Chicheng County                   | 117.60  | 2.92    | <0.005  | 26   |

Rate\*: These are annual EB smoothed incidence rates for human brucellosis.

1  
2  
3  
4 Figure 1 presented a percentile map of annual EB smoothed incidence rates for  
5  
6 human brucellosis in mainland China by county from 2004 to 2010. The figure  
7  
8 gives an indication of spatial associations: counties with similar colour shades  
9  
10 tended to be near each other. Outlier counties with extreme values were  
11  
12 highlighted (both high as well as low). Six legend categories were created,  
13  
14 corresponding to < 1%, 1% to <10%, 10% to <50%, 50% to <90%, 90% to <99%  
15  
16 and >99%. There were 29 counties at the high end.  
17  
18  
19

20  
21 The global Moran's I value of annual EB smoothed incidence rates for human  
22  
23 brucellosis in mainland China by county from 2004 to 2010 was 0.5803 (Z=  
24  
25 8.3660, P=0.0025), statistically significant at the 0.01 level.  
26  
27

28  
29 We also calculated the local Moran's I and gave a LISA cluster map of annual  
30  
31 EB smoothed incidence rates for human brucellosis in mainland China by county  
32  
33 from 2004 to 2010. LISA cluster map showed those counties with a significant  
34  
35 local Moran statistic classified by type of spatial correlation: bright red for the  
36  
37 high-high association, bright blue for low-low, light blue for low-high, and light red  
38  
39 for high-low (Figure 2). The high-high and low-low locations suggest clustering of  
40  
41 similar values, whereas the high-low and low-high locations indicate spatial  
42  
43 outliers, whereas the high-low and low-high locations indicate spatial  
44  
45 outliers.  
46  
47

48  
49 The Local Moran's I method of annual EB smoothed incidence rates for human  
50  
51 brucellosis showed major high-risk clustered areas of human brucellosis located  
52  
53 in northern China. High-risk counties were centered in Inner Mongolia (40  
54  
55 counties, 72.3%), Hebei (7 counties, 12.7%), Shanxi (5 counties, 9.1%),  
56  
57  
58  
59  
60

Heilongjiang (2 counties, 3.6%) and Jilin provinces (1 county, 1.8%) and included a total of 55 counties. These provinces accounted for 90.88% of the reported cases. EB smoothed incidence rates for these counties ranged from 7.70 to 1209.60 cases per 100,000 people.

<<Insert figure 1 here>>

<<Insert figure 2 here>>

### Changes in human brucellosis incidence rates from 2004 to 2010

The value of Global Moran's  $I$  of EB smoothed incidence rates increased from 0.2460 to 0.6179 during 2004-2010, indicating that the spatial distribution of human brucellosis had become more uneven (that is, the clustering of high and low values is becoming more prominent) (Table 2). The formal test of spatial dependence was statistically significant at the 0.01 level, implying that distribution of human brucellosis was spatially dependent in mainland China.

Table 2 Global spatial autocorrelation analyses for EB smoothed incidence rates for human brucellosis in mainland China (per year), 2004–2010

| Year | Moran's $I$ | Z-score | $P$ value |
|------|-------------|---------|-----------|
| 2004 | 0.2460      | 4.7733  | 0.0087    |
| 2005 | 0.4734      | 9.0229  | 0.0012    |
| 2006 | 0.4662      | 7.6853  | 0.0026    |
| 2007 | 0.5063      | 7.3102  | 0.0042    |
| 2008 | 0.5594      | 8.4932  | 0.0025    |
| 2009 | 0.5509      | 8.3389  | 0.0020    |
| 2010 | 0.6179      | 11.1187 | 0.0002    |

The clustered areas varied during the seven-year study period (Figure 3). The number of high-risk counties—that is, those counties included in clustered areas of high human brucellosis risk identified by the local Moran's  $I$



1  
2  
3  
4 method—increased from 25 in 2004 to 54 in 2010.

5  
6 The number of high-risk counties in Inner Mongolia Autonomous Region was the  
7  
8 largest one, increased from 22 in 2004 to 46 in 2010. Among the 101 counties in  
9  
10 Inner Mongolia Autonomous Region, the number of EB smoothed incidence  
11  
12 rates over 100 cases per 100,000 people increased from 8 in 2004 to 29 in 2010.  
13  
14 The most notable change was that the EB smoothed incidence rate in Sunitezuo  
15  
16 Banner increased from 373.7 in 2004 to 2,482.1 in 2009, but then decreased to  
17  
18 1,443.0 cases per 100,000 people in 2010.  
19  
20

21  
22 In Hebei Province, the number of high-risk counties kept an upward trend, rising  
23  
24 from 1 in 2004 to 3 in 2010. The most noteworthy change was that the EB  
25  
26 smoothed incidence rate in Wei County increased from 9.70 to 79.40 cases per  
27  
28 100,000 people between 2004 and 2010.  
29  
30

31  
32 The number of high-risk counties in Shanxi Province increased from zero in  
33  
34 2004 to 2 in 2010. The most notable change was that the EB smoothed  
35  
36 incidence rate in Xinrong District increased from 0.9 to 88.1 cases per 100,000  
37  
38 people between 2004 and 2010.  
39  
40

41  
42 In Jilin Province, the number of high-risk counties increased from zero in 2004 to  
43  
44 3 in 2010. The most notable change was that the EB smoothed incidence rate in  
45  
46 Tongyu County increased from zero to 155.6 cases per 100,000 people between  
47  
48 2004 and 2010.  
49  
50

51  
52 In Heilongjiang Province, the number of high-risk counties decreased from 2 to 0  
53  
54 between 2004 and 2010. Meris Daur District had the highest EB smoothed  
55  
56  
57  
58  
59  
60

1  
2  
3  
4 incidence rates of human brucellosis in the province, at more than 130 cases per  
5  
6 100,000 people per year between 2004 and 2010. The most notable change was  
7  
8 that the EB smoothed incidence rate in Zhaozhou County increased from 1.3 to  
9  
10  
11 74.2 cases per 100,000 people between 2004 and 2010.  
12

13  
14 <<Insert figure 3 here>>  
15

## 16 **DISCUSSION**

17  
18 In this paper, ESDA methods were used to explore spatial patterns of EB  
19  
20 smoothed incidence rates for human brucellosis at the county level in mainland  
21  
22 China from 2004 to 2010. We found that the occurrence of human brucellosis  
23  
24 persisted throughout many areas of the country and was spatially dependent  
25  
26 during the seven-year study period. Since human brucellosis is not a contagious  
27  
28 disease, spatial clusters of human brucellosis are most likely a result of animal  
29  
30 processing, shared food sources, more intensive agricultural production zones,  
31  
32 or similar socio-cultural practices.[17 29] Further researches are needed to  
33  
34 determine whether human brucellosis clusters in China are associated with  
35  
36 specific natural and/or social environmental characteristics. During the period  
37  
38 2004-2010, the areas with serious epidemics of human brucellosis persisted in  
39  
40 Inner Mongolia Autonomous Region and other Northern provinces (i.e., Hebei,  
41  
42 Shanxi, Jilin and Heilongjiang provinces) around the border with Inner Mongolia  
43  
44 Autonomous Region where animal husbandry had developed, all of which were  
45  
46 epidemic regions before the 1980s. This spatial pattern may be related to the  
47  
48 trans-boundary transfer of animal brucellosis in the region of Inner Mongolia  
49  
50  
51  
52  
53  
54  
55  
56  
57  
58  
59  
60

1  
2  
3  
4 from the neighboring hyper-endemic Mongolia, which had been described as the  
5  
6 country with the second highest incidence worldwide.[7 30] In addition, the  
7  
8 leading risk factors for the high incidence rate of human brucellosis were the  
9  
10 increase in animal feeding, lack of immunization and animal quarantine, and  
11  
12 frequent trading.[9 30]

13  
14  
15 Several intervention strategies had been suggested to reduce the incidence of  
16  
17 human brucellosis, such as increasing local knowledge of proper food handling  
18  
19 techniques of dairy products including pasteurization, decreasing occupational  
20  
21 exposures, quarantining, separating and eliminating of infected animals with  
22  
23 brucellosis, establishing surveillance point of brucellosis and its network, and  
24  
25 vaccination programs aimed at reducing the prevalence of disease in livestock.[8  
26  
27  
28  
29  
30  
31 31] However, Zhang[9] suggested that the most effective means of human  
32  
33 brucellosis control were the comprehensive measures of universal immunization  
34  
35 in livestock without quarantine in epidemic regions, which had been proved  
36  
37 effective measures.  
38  
39

40  
41 Previous study analyzed cluster identification of the annualized raw incidence  
42  
43 rates of county-level human brucellosis in China by using SaTScan and ArcGIS  
44  
45 software.[32] Our work is very different from the previous study. Firstly,  
46  
47 we used the EB smoothing technique to smooth the human brucellosis incidence  
48  
49 rates. Therefore, random variability was reduced and greater stability of  
50  
51 incidence rates was provided mainly in small counties. Secondly, although  
52  
53  
54  
55  
56 both the previous study and our work analyzed county-level human  
57  
58  
59  
60

1  
2  
3  
4  
5  
6  
7  
8  
9  
10  
11  
12  
13  
14  
15  
16  
17  
18  
19  
20  
21  
22  
23  
24  
25  
26  
27  
28  
29  
30  
31  
32  
33  
34  
35  
36  
37  
38  
39  
40  
41  
42  
43  
44  
45  
46  
47  
48  
49  
50  
51  
52  
53  
54  
55  
56  
57  
58  
59  
60

brucellosis cases in mainland China from 2004 to 2010, the previous study performed cluster detection by using a seven-year average human brucellosis cases which merely reflected the average spatial aggregation. In this paper, we performed the cluster detection year by year by using the annual human brucellosis cases from 2004 to 2010 which fully reflected the year-by-year changes in spatial pattern of human brucellosis incidence rates from 2004 to 2010. Thirdly, compared with the spatial scan statistic, LISA has a better chance of detecting true cluster areas with low false-positive rates especially performing well on outlier detection.[33] This is the first study, to the best of our knowledge, which has applied both ESDA methods and the EB smoothing technique to analyze spatial patterns of incidence rates for human brucellosis at the county level in mainland China. We believe that conclusions on the basis of the combinations of the two methods provide reliable results. The results of these two methods differed slightly and complemented each other. In addition, the previous study is just a letter, the results of which is very simple and rough and provided very limited information.

Our study is not without limitations. First of all, the number of reported cases of human brucellosis obtained from the CISDCP system might be only part of the actual incidence of human brucellosis across the country as human brucellosis is often underreported or misdiagnosed.[30] True human brucellosis rates might be much higher than reported. Nevertheless, the data used in this paper are still

1  
2  
3  
4 able to reflect the current trend in human brucellosis incidence in mainland  
5  
6 China. Secondly, cross-organizational collaboration (between public health,  
7  
8 clinics, and hospitals) has been very efficient within the healthcare system.  
9  
10 However, information-sharing between healthcare organizations and non-health  
11  
12 departments, such as the government's agriculture department, has not been  
13  
14 extensive. Currently, animal and human health disease surveillance databases  
15  
16 are not linked. Additionally, we can't obtain the data of animal brucellosis  
17  
18 because of confidentiality restrictions. [18] Therefore, we didn't analyze the  
19  
20 density of livestock compare with the distribution of human cases. Furthermore,  
21  
22 our analyses are based on county-level data. Smaller spatial units might provide  
23  
24 more location-specific information about the design and implementation stages  
25  
26 of public health programs.[14] The methods employed in this paper can be  
27  
28 applied to finer geographic units (e.g. postal units). Finer geographic units to  
29  
30 identify clusters within counties with higher burdens of human brucellosis would  
31  
32 be focused on in further research.  
33  
34  
35  
36  
37  
38  
39

40  
41 In conclusion, our study offered a good understanding of the spatial patterns of  
42  
43 human brucellosis incidence in mainland China, and might contribute to  
44  
45 determine allocating resources to high risk areas in order to reduce human  
46  
47 brucellosis incidence. With the assistance of the spatial framework provided by  
48  
49 our study, China's human brucellosis control programs could be focused on  
50  
51 locations where they will have the greatest influence.  
52  
53  
54  
55  
56  
57  
58  
59  
60

1  
2  
3  
4 **Funding** This work was supported by the National Infectious Disease  
5  
6 Surveillance Program of the Ministry of Science and Technology of the People's  
7  
8 Republic of China (No.2012ZX10004201) and the National Natural Science  
9  
10 Foundation of China (No. 30571618) .The funders had no role in study design,  
11  
12 data collection and analysis, decision to publish, or preparation of the  
13  
14 manuscript.  
15  
16

17  
18 **Contributors** JZ designed the research, collected data, drafted the manuscript,  
19  
20 analysed the data and interpreted the results. FY designed the research,  
21  
22 collected data, interpreted the results critically reviewed and edited the  
23  
24 manuscript. TZ, CY, XZ interpreted the results critically reviewed and edited the  
25  
26 manuscript. XL designed the research, interpreted the results, critically reviewed  
27  
28 and edited the manuscript and funding, and supervised. ZH offered research  
29  
30 data and edited the manuscript. All authors read and approved the final  
31  
32 manuscript.  
33  
34  
35  
36  
37

38 **Competing interests** None.

39  
40 **Provenance and peer review** Not commissioned; externally peer reviewed.

41  
42  
43  
44 **Data sharing statement** No additional data are available.  
45  
46  
47  
48  
49  
50  
51  
52  
53  
54  
55  
56  
57  
58  
59  
60

## REFERENCES

1. Seleem MN, Boyle SM, Sriranganathan N. Brucellosis: a re-emerging zoonosis. *Vet Microbiol* 2010;**140**(3):392-98.
2. De Massis F, Di Girolamo A, Petrini A, *et al.* Correlation between animal and human brucellosis in Italy during the period 1997–2002. *Clin Microbiol Infect* 2005;**11**(8):632-36.
3. Marianelli C, Graziani C, Santangelo C, *et al.* Molecular epidemiological and antibiotic susceptibility characterization of *Brucella* isolates from humans in Sicily, Italy. *J Clin Microbiol* 2007;**45**(9):2923-28.
4. Memish ZA, Balkhy HH. Brucellosis and international travel. *J Travel Med* 2004;**11**(1):49-55.
5. Wang D, Cui B, Wang Y, *et al.* Analysis on surveillance data of brucellosis in China, 2009. *Disease surveillance* 2010;**25**(12):944-46.
6. Lim HS, Min YS, Lee HS. Investigation of a series of brucellosis cases in Gyeongsangbuk-do during 2003-2004. *J Prev Med Public Health* 2005;**38**(4):482-88.
7. Pappas G, Papadimitriou P, Akritidis N, *et al.* The new global map of human brucellosis. *Lancet Infect Dis* 2006;**6**(2):91-99.
8. Shang D, Xiao D, Yin J. Epidemiology and control of brucellosis in China. *Vet Microbiol* 2002;**90**(1):165-82.
9. Zhang J. Reasons and prevention and control measures for the high brucellosis incidence. *Disease surveillance* 2010;**25**(5):341-42.
10. Li Y, Yu X, He T. An analysis of brucellosis epidemic situation in humans from 2004 to 2010 in China. *Chinese Journal of Control of Endemic Disenaces* 2012;**27**(1):18-20.
11. Gao G, Xu J, Ke Y, *et al.* Literature analysis of brucellosis epidemic situation and research progress

- 1  
2  
3  
4 in China from 2000 to 2010. *Chinese Journal of Zoonoses* 2012;**28**(12):1178-84.
- 5  
6  
7 12. Anselin L. Exploratory spatial data analysis and geographic information systems. *New tools for*  
8  
9  
10  
11  
12  
13  
14  
15  
16  
17  
18  
19 application of empirical Bayesian smoothing and Exploratory Spatial Data Analysis (ESDA)  
20  
21  
22 methods. *Int J Health Geogr* 2009;**8**(1):12.
- 23  
24 15. Martins - Melo FR, Ramos AN, Alencar CH, et al. Mortality of Chagas' disease in Brazil: spatial  
25  
26  
27  
28  
29  
30  
31  
32 patterns and definition of high - risk areas. *Trop Med Int Health* 2012;**17**(9):1066-75.
- 33  
34 16. Clayton D, Kaldor J. Empirical Bayes estimates of age-standardized relative risks for use in disease  
35  
36  
37  
38  
39  
40  
41  
42 mapping. *Biometrics* 1987:671-81.
- 43  
44 17. Abdullayev R, Kracalik I, Ismayilova R, et al. Analyzing the spatial and temporal distribution of  
45  
46  
47  
48  
49  
50  
51  
52 human brucellosis in Azerbaijan (1995-2009) using spatial and spatio-temporal statistics. *BMC Infect*  
53  
54  
55  
56  
57  
58  
59  
60 *Dis* 2012;**12**(1):185.
18. Wang L, Wang Y, Yang G, et al. China Information System for Disease Control and Prevention  
(CISDCP). <http://www.pacifichealthsummit.org/downloads/HITCaseStudies/Functional/CISDCP.pdf> (Accessed 26 January 2013).
19. Cao M, Feng Z, Zhang J, et al. Contextual risk factors for regional distribution of Japanese  
encephalitis in the People's Republic of China. *Trop Med Int Health* 2010;**15**(8):918-23.
20. Zhang W, Guo W, Sun S, et al. Human brucellosis, Inner Mongolia, China. *Emerg Infect Dis*  
2010;**16**(12):2001-03



- 1  
2  
3  
4 21. Yin F, Feng Z, Li X. Spatial analysis of primary and secondary syphilis incidence in China,  
5  
6 2004–2010. *Int J STD AIDS* 2012;**23**(12):870-75.  
7  
8  
9 22. Maguire DJ, Batty M, Goodchild MF. GIS, spatial analysis and modelling. *ESRI, Redlands, CA*,  
10  
11 2005:93–111.  
12  
13 23. Anselin L, Lozano N, Koschinsky J. Rate transformations and smoothing. *Urbana* 2006;**51**:61801.  
14  
15 24. Anselin L. Exploring spatial data with GeoDaTM: a workbook. *Urbana* 2004;**51**:61801.  
16  
17 25. Anselin L, Syabri I, Kho Y. GeoDa: an introduction to spatial data analysis. *Geographical analysis*  
18  
19 2006;**38**(1):5-22.  
20  
21  
22 26. Anselin L. Local indicators of spatial association—LISA. *Geographical analysis* 1995;**27**(2):93-115  
23  
24  
25 27. Fang L, Yan L, Liang S, et al. Spatial analysis of hemorrhagic fever with renal syndrome in China.  
26  
27 *BMC Infect Dis* 2006;**6**(1):77  
28  
29  
30 28. Dewan AM, Corner R, Hashizume M, et al. Typhoid Fever and Its Association with Environmental  
31  
32 Factors in the Dhaka Metropolitan Area of Bangladesh: A Spatial and Time-Series Approach. *PLoS*  
33  
34 *Negl Trop Dis* 2013;**7**(1):e1998.  
35  
36  
37 29. Fosgate GT, Carpenter TE, Chomel BB, et al. Time-space clustering of human brucellosis, California,  
38  
39 1973-1992. *Emerg. Infect. Dis* 2002;**8**(7):672-78  
40  
41  
42 30. Zhong Z, Yu S, Wang X, et al. Human brucellosis in the People's Republic of China during  
43  
44 2005-2010. *Int J Infect Dis* 2013:289-92.  
45  
46  
47 31. Al-Shamahy H, Whitty C, Wright S. Risk factors for human brucellosis in Yemen: a case control  
48  
49 study. *Epidemiol Infect* 2000;**125**(2):309-13.  
50  
51  
52 32. Chen Z, Zhang W, Ke Y, et al. High-Risk Regions of Human Brucellosis in China: Implications for  
53  
54 Prevention and Early Diagnosis of Travel-Related Infections. *Clin Infect Dis* 2013;**57**(2):330-32.  
55  
56  
57  
58  
59  
60

1  
2  
3  
4  
5  
6  
7  
8  
9  
10  
11  
12  
13  
14  
15  
16  
17  
18  
19  
20  
21  
22  
23  
24  
25  
26  
27  
28  
29  
30  
31  
32  
33  
34  
35  
36  
37  
38  
39  
40  
41  
42  
43  
44  
45  
46  
47  
48  
49  
50  
51  
52  
53  
54  
55  
56  
57  
58  
59  
60

33. Jackson MC, Huang L, Luo J, *et al.* Comparison of tests for spatial heterogeneity on data with global clustering patterns and outliers. *Int J Health Geogr* 2009;**8**(1):55.

For peer review only

## Figure legends

Figure 1 Percentile map of annual EB smoothed incidence rates for human brucellosis in mainland China by county, 2004-2010

Figure 2 LISA cluster map of annual EB smoothed incidence rates for human brucellosis in mainland China by county, 2004-2010

Figure 3 LISA cluster maps of EB smoothed incidence rates for human brucellosis in mainland China by county (per year), 2004-2010

1  
2  
3  
4 **Article type: research paper**

5  
6 **Spatial analysis on human brucellosis incidence in**  
7  
8 **mainland China: 2004-2010**  
9

10  
11 Junhui Zhang,<sup>1,2#</sup> Fei Yin,<sup>1#</sup> Tao Zhang,<sup>1</sup> Chao Yang,<sup>2</sup> Xingyu Zhang,<sup>1</sup> Zijian  
12  
13 Feng,<sup>3</sup> Xiaosong Li<sup>1\*</sup>  
14

15  
16 1 West China School of Public Health, Sichuan University, Chengdu 610041, PR  
17  
18 China  
19

20  
21 2 School of Public Health, Luzhou Medical College, Luzhou 646000, PR China  
22

23  
24 3 Chinese Center for Disease Control and Prevention, Beijing 102206, PR China  
25

26  
27  
28  
29 \*Correspondence to: Professor Xiaosong Li, Department of Medical Statistics,  
30  
31 West China School of Public Health, Sichuan University, No.17 Section 3, South  
32  
33 Renmin Road, Chengdu 610041, PR China. Tel: +86 18608021962  
34

35  
36 Email address: lixiaosong1019@163.com  
37

38  
39 # These authors contributed equally to this work  
40  
41  
42

43  
44 **ABSTRACT**  
45

46 **Objectives:** China has experienced a sharply increasing rate of human  
47  
48 brucellosis in recent years. Effective spatial monitoring of human brucellosis  
49  
50 incidence is very important for successful implementation of control and  
51  
52 prevention programs. The purpose of this paper is to apply exploratory spatial  
53  
54 data analysis (ESDA) methods and the empirical Bayes (EB) smoothing  
55  
56  
57  
58  
59  
60

1  
2  
3  
4 technique to monitor county-level incidence rates for human brucellosis in  
5  
6 mainland China from 2004 to 2010 by examining spatial patterns.  
7

8  
9 **Methods:** ESDA methods were used to characterize spatial patterns of EB  
10  
11 smoothed incidence rates for human brucellosis based on county-level data  
12  
13 obtained from the China Information System for Disease Control and Prevention  
14  
15 (CISDCP) in mainland China from 2004 to 2010.  
16

17  
18 **Results:** EB smoothed incidence rates for human brucellosis were spatially  
19  
20 dependent during 2004-2010. The local Moran test identified significantly  
21  
22 high-risk clusters of human brucellosis (all P-values <0.01), which persisted  
23  
24 during the seven-year study period. High-risk counties were centered in Inner  
25  
26 Mongolia Autonomous Region and other Northern provinces (i.e., Hebei, Shanxi,  
27  
28 Jilin and Heilongjiang provinces) around the border with Inner Mongolia  
29  
30 Autonomous Region where animal husbandry was highly developed. The  
31  
32 number of high-risk counties increased from 25 in 2004 to 54 in 2010.  
33  
34  
35  
36  
37

38  
39 **Conclusions:** ESDA methods and the EB smoothing technique can assist  
40  
41 public health officials in identifying high-risk areas. Allocating more resources to  
42  
43 high-risk areas is an effective way to reduce human brucellosis incidence.  
44  
45

46  
47 **Keywords:** *Human brucellosis, exploratory spatial data analysis, empirical*  
48  
49 *Bayes smoothing, spatial autocorrelation, cluster detection*  
50

51  
52 **Word Count:** 3208  
53  
54  
55  
56  
57  
58  
59  
60

## ARTICLE SUMMARY

### Article focus

- The incidence rates of human brucellosis are not distributed evenly across regions in China. Awareness of the spatial patterns of human brucellosis is quite beneficial for the prevention and control of the disease.
- ESDA methods and the empirical Bayes smoothing technique are commonly combined to characterize spatial epidemiology of diseases.

### Key messages

- EB smoothed incidence rates for human brucellosis were spatially dependent during 2004-2010. The local Moran test identified **significantly high-risk clusters of human brucellosis**, which persisted during the seven-year study period.
- High-risk counties were centered in Inner Mongolia Autonomous Region and other Northern provinces around the border with Inner Mongolia Autonomous Region where animal husbandry **was highly** developed.
- ESDA methods and the EB smoothing technique can assist public health officials in identifying high-risk areas.

### Strengths and limitations of this study

- ESDA methods and the EB smoothing technique were used to analyze spatial patterns of incidence rates for human brucellosis at the county level in mainland China. Therefore, random variability was reduced, and greater stability of incidence rates was provided mainly in small counties and true

1  
2  
3  
4 cluster areas with low false-positive rates especially performing well on  
5  
6 outlier detection had a better chance of being detected.  
7

- 8  
9 ■ The number of reported cases of human brucellosis obtained from the  
10  
11 CISDCP system might be only part of the actual incidence of human  
12  
13 brucellosis across the country as human brucellosis is often underreported  
14  
15 or misdiagnosed.  
16  
17
- 18  
19 ■ Our analyses are based on county-level data. Smaller spatial units might  
20  
21 provide more location-specific information **about** the design and  
22  
23 implementation stages of public health programs.  
24

## 25 26 INTRODUCTION

27  
28 Brucellosis, caused by *Brucella* species, is a zoonotic disease recognized as an  
29  
30 emerging and re-emerging threat to public and veterinary health.[1] The disease  
31  
32 is transmitted to humans by direct/indirect contact with infected animals or  
33  
34 through the consumption of contaminated foods.[2-4] People with occupational  
35  
36 exposure are at highest risk for brucellosis, in particular those performing  
37  
38 husbandry activities, butchering, and livestock trading.[5 6] Worldwide economic  
39  
40 losses **caused by** brucellosis are extensive not only in animal production but also  
41  
42 in public health.[1] Although brucellosis has been eradicated from many  
43  
44 industrialized countries, new foci of disease continually appear, particularly in  
45  
46 parts of Asia.[7]  
47  
48

49  
50 Brucellosis is classified as one of the Class II national notifiable diseases by the  
51  
52 Centers for Disease Control and Prevention (CDC) and **as a key disease in**  
53  
54  
55  
56  
57  
58  
59  
60

1  
2  
3  
4 **Class II** by the Implement Detailed Rules of the By-law

5  
6 on Disease Prevention and Control of Livestock and Poultry in mainland  
7  
8 China.[8] The disease was first reported in China in 1905.[8] Human brucellosis  
9  
10 incidence was quite severe before 1980s in the country, later decreased and  
11  
12 remained at a low level. From 1995 to 2001, the incidence of human brucellosis  
13  
14 increased rapidly, and spread more than 10 provinces.[8] In recent years, With  
15  
16 the rapid development of China's animal husbandry, human brucellosis  
17  
18 incidence had increased sharply.[9] Nationwide surveillance data indicated that  
19  
20 the total incidence rate of human brucellosis in mainland China increased from  
21  
22 0.92 cases per 100,000 people in 2004 to 2.62 cases per 100,000 people in  
23  
24 2010.[10] Currently, human brucellosis is considered an important public health  
25  
26 problem in mainland China.[11]

27  
28  
29 The incidence rates of human brucellosis are not distributed evenly across  
30  
31 regions in China.[10] Awareness of the spatial patterns of human brucellosis is  
32  
33 quite beneficial for the prevention and control of the disease. Exploratory spatial  
34  
35 data analysis (ESDA) methods are emerging useful approaches to achieve this  
36  
37 understanding.[12] ESDA is a set of techniques used to describe and visualize  
38  
39 spatial distributions, identify atypical locations or spatial outliers, discover  
40  
41 patterns of spatial association, clusters or hot spots, and suggest spatial regimes  
42  
43 or other forms of spatial heterogeneity.[12 13] The methods can be applied by  
44  
45 health officials to monitor spatial variations in disease rates, which can assist  
46  
47 health officials in designing more location-specific control and prevention  
48  
49  
50  
51  
52  
53  
54  
55  
56  
57  
58  
59  
60



1  
2  
3 programs **by taking** into account global and local spatial influences.[14]  
4  
5  
6 Measures of spatial autocorrelation are at the core of ESDA methods.[13] ESDA  
7  
8 methods and the empirical Bayes (EB) smoothing technique are commonly  
9  
10 combined to characterize spatial epidemiology of diseases.[14-17] The EB  
11  
12 smoothing technique is used to reduce random variation and to provide greater  
13  
14 stability of rates mainly in small areas associated with small populations.[16]  
15  
16  
17 The primary purpose of this paper is to apply ESDA methods and the EB  
18  
19 smoothing technique to monitor county-level incidence rates for human  
20  
21 brucellosis in mainland China from 2004 to 2010 by examining spatial patterns.  
22  
23  
24 We also identified the potential presence of clusters of the disease in mainland  
25  
26  
27 China, thus to provide spatial guidance for future research.  
28  
29

## 30 31 **METHODS**

### 32 33 **Data source**

34  
35  
36 Human brucellosis cases including 2872 counties in mainland China from 2004  
37  
38 to 2010 were collected through the Internet-based disease-reporting system  
39  
40 (China Information System for Disease Control and Prevention, CISDCP), which  
41  
42 was established in 2004 and was more integrated, effective, and reliable than  
43  
44 the previous case-reporting system.[18 19] **In mainland China, human**  
45  
46 **brucellosis is a reportable disease. Suspected or confirmed cases must be**  
47  
48 **reported to local and provincial Centers for Disease Control and Prevention**  
49  
50 **(CDC) and then to Chinese CDC (CCDC). To meet case definitions, disease in**  
51  
52 **persons must be accompanied by clinical signs and must be confirmed by**  
53  
54  
55  
56  
57  
58  
59  
60

1  
2  
3  
4 serologic tests or isolation in accordance with the case definition of the World  
5  
6 Health Organization.[20]  
7

8  
9 In this paper, the incidence rates of human brucellosis in fact referred to the  
10 reported incidence rates. In order to conduct a geographic information system  
11 (GIS) -based analysis of the spatial distribution of human brucellosis, the  
12  
13 county-level polygon map at a 1:1,000,000 scale was obtained.[21]  
14  
15

16  
17 Demographic information from 2004 to 2010 was acquired from the National  
18  
19 Bureau of Statistics of China. All human brucellosis cases were geocoded and  
20  
21 matched to the county-level layers of the polygons by administrative code using  
22  
23 the software Mapinfo7.0.[21]  
24  
25  
26  
27

### 28 **EB smoothing technique**

29  
30 When raw rates derived from different counties across the whole study area are  
31  
32 applied to estimate the underlying disease risk, differences in population size  
33  
34 result in variance instability and spurious outliers. This is because the rates  
35  
36 observed in areas with small populations may be highly unstable in that the  
37  
38 addition or deletion of one or two cases can cause drastic changes in the  
39  
40 observed values. Therefore, raw rates may not fully represent the relative  
41  
42 magnitude of the underlying risks if compared with other counties with high  
43  
44 population base. To overcome this problem, the EB smoothing technique  
45  
46 proposed by Clayton and Kaldor[16] was applied to our brucellosis data. This  
47  
48 method adjusts raw rates by incorporating data from other neighbouring spatial  
49  
50 units.[22] Essentially, raw rates get 'shrunk' towards an overall mean which is an  
51  
52  
53  
54  
55  
56  
57  
58  
59  
60

1  
2  
3  
4 inverse function of the variance. Application of EB smoothed incidence rate not  
5  
6 only provides better visualization compared with raw rate but also serves to find  
7  
8 true outliers.[23]  
9

### 10 **Spatial autocorrelation analysis**

11 We performed spatial autocorrelation analysis in GeoDa0.9.5-i software.[24]  
12  
13 Both global and local Moran's I statistics were calculated. The global Moran's I  
14  
15 statistic was estimated to assess the evidence of global spatial autocorrelation  
16  
17 (clustering) of incidence rates over the study region.[25] Anselin's local Moran's I  
18  
19 (LISA) statistic indicates the location of local clusters and spatial outliers.[26]  
20  
21 Spatial autocorrelation statistics for human brucellosis incidence rates were  
22  
23 calculated based on the assumption of constant variance. The assumption might  
24  
25 be violated when incidence rates at the county level varied greatly across the  
26  
27 whole study region.[27] The EB smoothing technique was performed to adjust  
28  
29 for this violation. The standardized first-order contiguity Queen neighbours were  
30  
31 used as the criteria for identifying neighbors in this paper. A significant test was  
32  
33 performed through the permutation test, and a reference distribution was  
34  
35 generated under an assumption that the incidence was randomly distributed. In  
36  
37 order to obtain more robust results, the number of permutation test was set to  
38  
39 9999. Since multiple comparisons increased the chances of identifying  
40  
41 overlapping clusters, the significance level was set at 0.01. Based on these  
42  
43 permutations and threshold, we have plotted values on a map to display the  
44  
45 location of human brucellosis clusters in mainland China.[28]  
46  
47  
48  
49  
50  
51  
52  
53  
54  
55  
56  
57  
58  
59  
60

## RESULTS

### Annualized average of human brucellosis from 2004 to 2010

A total of 164,752 human brucellosis cases were reported in mainland China from 2004 to 2010. Annual EB smoothed incidence rates for human brucellosis for all 2872 counties were calculated. Table 1 presents annual EB smoothed incidence rates for human brucellosis over 100 cases per 100, 000 people in 28 counties, which accounted for 34.41% of all cases in the country during the study period. Inner Mongolia Autonomous Region had the highest number of 23, centered in Xilin Gol League, Ulanqab League, Hulunbeier City, Xing'an League, Baotou City, Chifeng City, Hohhot City, and Tongliao City.

Summary statistics for the annual EB smoothed incidence rates for all counties were calculated. The mean and standard deviation were 4.64 and 38.66, respectively, per 100,000 people. The statistic for outliers was the computed z-value, which was the difference between the observed and expected mean of the annual EB smoothed incidence rates standardized by the standard deviation. Thus, it had a mean of zero and a standard deviation of 1. Sunitezuo Banner in Xilin Gol League in Inner Mongolia had the highest annual EB smoothed incidence rate of 1209.60, with 31.16 standard deviations from the mean. All 28 counties were at least 2.59 standard deviations from the mean, as shown in Table 1.

Table 1 Counties with annual EB smoothed incidence rates of human brucellosis over 100 per 100, 000 in mainland China, 2004–2010

| No. | Province     | City                | County                            | Rate*   | Z-value | P-value | Rank |
|-----|--------------|---------------------|-----------------------------------|---------|---------|---------|------|
| 1   | Inner        | Xilin Gol           | Sunitezuo Banner                  | 1209.60 | 31.16   | <0.001  | 1    |
| 2   | Mongolia     | League              | Abag Banner                       | 1004.10 | 25.85   | <0.001  | 2    |
| 3   |              |                     | Bordered Yellow Banner            | 826.90  | 21.27   | <0.001  | 3    |
| 4   |              |                     | Plain Blue Banner                 | 364.40  | 9.30    | <0.001  | 4    |
| 5   |              |                     | Zhenxianghuang Banner             | 303.70  | 7.73    | <0.001  | 5    |
| 6   |              |                     | Sunite Right Banner               | 294.60  | 7.50    | <0.001  | 6    |
| 7   |              |                     | west ujimqin banner               | 243.50  | 6.18    | <0.001  | 9    |
| 8   |              |                     | Xilinhot City                     | 236.80  | 6.00    | <0.001  | 10   |
| 9   |              |                     | East Ujumqin Banner               | 219.00  | 5.54    | <0.001  | 11   |
| 10  |              |                     | Duolun County                     | 176.70  | 4.45    | <0.001  | 15   |
| 11  |              | Ulanqab             | Siziwang Banner                   | 257.90  | 6.55    | <0.001  | 7    |
| 12  |              | League              | Huade County                      | 179.00  | 4.51    | <0.001  | 14   |
| 13  |              |                     | Qahar Right Wing<br>Rear Banner   | 163.90  | 4.12    | <0.001  | 16   |
| 14  |              |                     | Shangdu County                    | 142.40  | 3.56    | <0.001  | 20   |
| 15  |              |                     | Chahar Right Middle<br>Banner     | 128.80  | 3.21    | <0.002  | 23   |
| 16  |              | Hulunbeier<br>City  | New Barhu Right<br>Banner         | 255.10  | 6.48    | <0.001  | 8    |
| 17  |              |                     | New Barhu Left<br>Banner          | 203.40  | 5.14    | <0.001  | 13   |
| 18  |              |                     | Zhalantun City                    | 144.20  | 3.61    | <0.001  | 19   |
| 19  |              | Xing'an League      | Horqin Right Wing<br>Front Banner | 146.00  | 3.66    | <0.001  | 18   |
| 20  |              | Baotou City         | Daerhanmaomingan<br>Union Banner  | 129.80  | 3.24    | <0.002  | 22   |
| 21  |              | Chifeng City        | Keshiketeng Banner                | 126.50  | 3.15    | <0.002  | 24   |
| 22  |              | Hohhot City         | Qingshuihe County                 | 123.90  | 3.08    | <0.005  | 25   |
| 23  |              | Tongliao City       | Jarud Banner                      | 104.90  | 2.59    | <0.010  | 28   |
| 24  | Shanxi       | Datong City         | Tianzhen County                   | 162.30  | 4.08    | <0.001  | 17   |
| 25  |              |                     | Guangling County                  | 136.50  | 3.41    | <0.001  | 21   |
| 26  |              | Xinzhou City        | Shengchi County                   | 107.70  | 2.67    | <0.010  | 27   |
| 27  | Heilongjiang | Qiqihar City        | Meris Daur District               | 208.10  | 5.26    | <0.001  | 12   |
| 28  | Hebei        | Zhangjiakou<br>City | Chicheng County                   | 117.60  | 2.92    | <0.005  | 26   |

Rate\*: These are annual EB smoothed incidence rates for human brucellosis.

1  
2  
3  
4 Figure 1 presented a percentile map of annual EB smoothed incidence rates for  
5  
6 human brucellosis in mainland China by county from 2004 to 2010. The figure  
7  
8 gives an indication of spatial associations: counties with similar colour shades  
9  
10 tended to be near each other. Outlier counties with extreme values were  
11  
12 highlighted (both high as well as low). Six legend categories were created,  
13  
14 corresponding to < 1%, 1% to <10%, 10% to <50%, 50% to <90%, 90% to <99%  
15  
16 and >99%. There were 29 counties at the high end.  
17  
18  
19

20  
21 The global Moran's I value of annual EB smoothed incidence rates for human  
22  
23 brucellosis in mainland China by county from 2004 to 2010 was 0.5803 ( $Z=$   
24  
25 8.3660,  $P=0.0025$ ), statistically significant at the 0.01 level.  
26  
27

28  
29 We also calculated the local Moran's I and gave a LISA cluster map of annual  
30  
31 EB smoothed incidence rates for human brucellosis in mainland China by county  
32  
33 from 2004 to 2010. LISA cluster map showed those counties with a significant  
34  
35 local Moran statistic classified by type of spatial correlation: bright red for the  
36  
37 high-high association, bright blue for low-low, light blue for low-high, and light red  
38  
39 for high-low (Figure 2). The high-high and low-low locations suggest clustering of  
40  
41 similar values, whereas the high-low and low-high locations indicate spatial  
42  
43 outliers, whereas the high-low and low-high locations indicate spatial  
44  
45 outliers.  
46  
47

48  
49 The Local Moran's I method of annual EB smoothed incidence rates for human  
50  
51 brucellosis showed **major high-risk clustered areas of human brucellosis** located  
52  
53 in northern China. High-risk counties were centered in Inner Mongolia (40  
54  
55 counties, 72.3%), Hebei (7 counties, 12.7%), Shanxi (5 counties, 9.1%),  
56  
57  
58  
59  
60

Heilongjiang (2 counties, 3.6%) and Jilin provinces (1 county, 1.8%) and included a total of 55 counties. These provinces accounted for 90.88% of the reported cases. EB smoothed incidence rates for these counties ranged from 7.70 to 1209.60 cases per 100,000 people.

<<Insert figure 1 here>>

<<Insert figure 2 here>>

### Changes in human brucellosis incidence rates from 2004 to 2010

The value of Global Moran's  $I$  of EB smoothed incidence rates increased from 0.2460 to 0.6179 during 2004-2010, indicating that the spatial distribution of human brucellosis had become more uneven (that is, the clustering of high and low values is becoming more prominent) (Table 2). The formal test of spatial dependence was statistically significant at the 0.01 level, implying that distribution of human brucellosis was spatially dependent in mainland China.

Table 2 Global spatial autocorrelation analyses for EB smoothed incidence rates for human brucellosis in mainland China (per year), 2004–2010

| Year | Moran's $I$ | Z-score | $P$ value |
|------|-------------|---------|-----------|
| 2004 | 0.2460      | 4.7733  | 0.0087    |
| 2005 | 0.4734      | 9.0229  | 0.0012    |
| 2006 | 0.4662      | 7.6853  | 0.0026    |
| 2007 | 0.5063      | 7.3102  | 0.0042    |
| 2008 | 0.5594      | 8.4932  | 0.0025    |
| 2009 | 0.5509      | 8.3389  | 0.0020    |
| 2010 | 0.6179      | 11.1187 | 0.0002    |

The clustered areas varied during the seven-year study period (Figure 3). The number of high-risk counties—that is, those counties included in clustered areas of high human brucellosis risk identified by the local Moran's  $I$

1  
2  
3  
4 method—increased from 25 in 2004 to 54 in 2010.

5  
6 The number of high-risk counties in Inner Mongolia Autonomous Region was the  
7  
8 largest one, increased from 22 in 2004 to 46 in 2010. Among the 101 counties in  
9  
10 Inner Mongolia Autonomous Region, the number of EB smoothed incidence  
11  
12 rates over 100 cases per 100,000 people increased from 8 in 2004 to 29 in 2010.  
13  
14 The most notable change was that the EB smoothed incidence rate in Sunitezuo  
15  
16 Banner increased from 373.7 in 2004 to 2,482.1 in 2009, but then decreased to  
17  
18 1,443.0 cases per 100,000 people in 2010.  
19  
20

21  
22 In Hebei Province, the number of high-risk counties kept an upward trend, rising  
23  
24 from 1 in 2004 to 3 in 2010. The most noteworthy change was that the EB  
25  
26 smoothed incidence rate in Wei County increased from 9.70 to 79.40 cases per  
27  
28 100,000 people between 2004 and 2010.  
29  
30

31  
32 The number of high-risk counties in Shanxi Province increased from zero in  
33  
34 2004 to 2 in 2010. The most notable change was that the EB smoothed  
35  
36 incidence rate in Xinrong District increased from 0.9 to 88.1 cases per 100,000  
37  
38 people between 2004 and 2010.  
39  
40

41  
42 In Jilin Province, the number of high-risk counties increased from zero in 2004 to  
43  
44 3 in 2010. The most notable change was that the EB smoothed incidence rate in  
45  
46 Tongyu County increased from zero to 155.6 cases per 100,000 people between  
47  
48 2004 and 2010.  
49  
50

51  
52 In Heilongjiang Province, the number of high-risk counties decreased from 2 to 0  
53  
54 between 2004 and 2010. Meris Daur District had the highest EB smoothed  
55  
56  
57  
58  
59  
60



1  
2  
3  
4 incidence rates of human brucellosis in the province, at more than 130 cases per  
5  
6 100,000 people per year between 2004 and 2010. The most notable change was  
7  
8 that the EB smoothed incidence rate in Zhaozhou County increased from 1.3 to  
9  
10 74.2 cases per 100,000 people between 2004 and 2010.  
11  
12

13  
14 <<Insert figure 3 here>>  
15

## 16 **DISCUSSION**

17  
18 In this paper, ESDA methods were used to explore spatial patterns of EB  
19  
20 smoothed incidence rates for human brucellosis at the county level in mainland  
21  
22 China from 2004 to 2010. We found that the occurrence of human brucellosis  
23  
24 persisted throughout many areas of the country and was spatially dependent  
25  
26 during the seven-year study period. Since human brucellosis is not a contagious  
27  
28 disease, spatial clusters of human brucellosis are most likely a result of animal  
29  
30 processing, shared food sources, more intensive agricultural production zones,  
31  
32 or similar socio-cultural practices.[17 29] Further researches are needed to  
33  
34 determine whether **human brucellosis clusters in China** are associated with  
35  
36 specific natural and/or social environmental characteristics. During the period  
37  
38 2004-2010, the areas with serious epidemics of human brucellosis persisted in  
39  
40 Inner Mongolia Autonomous Region and other Northern provinces (i.e., Hebei,  
41  
42 Shanxi, Jilin and Heilongjiang provinces) around the border with Inner Mongolia  
43  
44 Autonomous Region where animal husbandry had developed, all of which were  
45  
46 epidemic regions before the 1980s. This spatial pattern may be related to the  
47  
48 trans-boundary transfer of animal brucellosis in the region of Inner Mongolia  
49  
50  
51  
52  
53  
54  
55  
56  
57  
58  
59  
60

1  
2  
3  
4 from the neighboring hyper-endemic Mongolia, which had been described as the  
5  
6 country with the second highest incidence worldwide.[7 30] In addition, the  
7  
8 leading risk factors for the high incidence rate of human brucellosis were the  
9  
10 increase in animal feeding, lack of immunization and animal quarantine, and  
11  
12 frequent trading.[9 30]

13  
14  
15 Several intervention strategies had been suggested to reduce the incidence of  
16  
17 human brucellosis, such as increasing local knowledge of proper food handling  
18  
19 techniques of dairy products including pasteurization, decreasing occupational  
20  
21 exposures, quarantining, separating and eliminating of infected animals with  
22  
23 brucellosis, establishing surveillance point of brucellosis and its network, and  
24  
25 vaccination programs aimed at reducing the prevalence of disease in livestock.[8  
26  
27  
28  
29  
30  
31 31] However, Zhang[9] suggested that the most effective means of human  
32  
33 brucellosis control were the comprehensive measures of universal immunization  
34  
35 in livestock without quarantine in epidemic regions, **which had been proved**  
36  
37 **effective measures.**  
38  
39

40  
41 Previous study analyzed cluster identification of the annualized raw incidence  
42  
43 rates of county-level human brucellosis in China by using SaTScan and ArcGIS  
44  
45 software.[32] **Our work is very different from the previous study.** Firstly,  
46  
47 we used the EB smoothing technique to smooth the human brucellosis incidence  
48  
49 rates. Therefore, random variability was reduced and greater stability of  
50  
51 incidence rates was provided mainly in small counties. **Secondly, although**  
52  
53 **both the previous study and our work analyzed county-level human**  
54  
55  
56  
57  
58  
59  
60

1  
2  
3  
4  
5  
6  
7  
8  
9  
10  
11  
12  
13  
14  
15  
16  
17  
18  
19  
20  
21  
22  
23  
24  
25  
26  
27  
28  
29  
30  
31  
32  
33  
34  
35  
36  
37  
38  
39  
40  
41  
42  
43  
44  
45  
46  
47  
48  
49  
50  
51  
52  
53  
54  
55  
56  
57  
58  
59  
60

brucellosis cases in mainland China from 2004 to 2010, the previous study performed cluster detection by using a seven-year average human brucellosis cases which merely reflected the average spatial aggregation. In this paper, we performed the cluster detection year by year by using the annual human brucellosis cases from 2004 to 2010 which fully reflected the year-by-year changes in spatial pattern of human brucellosis incidence rates from 2004 to 2010. Thirdly, compared with the spatial scan statistic, LISA has a better chance of detecting true cluster areas with low false-positive rates especially performing well on outlier detection.[33] This is the first study, to the best of our knowledge, which has applied both ESDA methods and the EB smoothing technique to analyze spatial patterns of incidence rates for human brucellosis at the county level in mainland China. We believe that conclusions on the basis of the combinations of the two methods provide reliable results. The results of these two methods differed slightly and complemented each other. In addition, the previous study is just a letter, the results of which is very simple and rough and provided very limited information.

Our study is not without limitations. First of all, the number of reported cases of human brucellosis obtained from the CISDCP system might be only part of the actual incidence of human brucellosis across the country as human brucellosis is often underreported or misdiagnosed.[30] True human brucellosis rates might be much higher than reported. Nevertheless, the data used in this paper are still

1  
2  
3  
4 able to reflect the current trend in human brucellosis incidence in mainland  
5  
6 China. Secondly, cross-organizational collaboration (between public health,  
7  
8 clinics, and hospitals) has been very efficient within the healthcare system.  
9  
10 However, information-sharing between healthcare organizations and non-health  
11  
12 departments, such as the government's agriculture department, has not been  
13  
14 extensive. Currently, animal and human health disease surveillance databases  
15  
16 are not linked. Additionally, we can't obtain the data of animal brucellosis  
17  
18 because of confidentiality restrictions. [18] Therefore, we didn't analyze the  
19  
20 density of livestock compare with the distribution of human cases. Furthermore,  
21  
22 our analyses are based on county-level data. Smaller spatial units might provide  
23  
24 more location-specific information about the design and implementation stages  
25  
26 of public health programs.[14] The methods employed in this paper can be  
27  
28 applied to finer geographic units (e.g. postal units). Finer geographic units to  
29  
30 identify clusters within counties with higher burdens of human brucellosis would  
31  
32 be focused on in further research.  
33  
34  
35  
36  
37  
38  
39

40  
41 In conclusion, our study offered a good understanding of the spatial patterns of  
42  
43 human brucellosis incidence in mainland China, and might contribute to  
44  
45 determine allocating resources to high risk areas in order to reduce human  
46  
47 brucellosis incidence. With the assistance of the spatial framework provided by  
48  
49 our study, China's human brucellosis control programs could be focused on  
50  
51 locations where they will have the greatest influence.  
52  
53  
54  
55  
56  
57  
58  
59  
60

1  
2  
3  
4 **Contributors** JZ designed the research, collected data, drafted the manuscript,  
5  
6 analysed the data and interpreted the results. FY designed the research,  
7  
8 collected data, interpreted the results critically reviewed and edited the  
9  
10 manuscript. TZ, CY, XZ interpreted the results critically reviewed and edited the  
11  
12 manuscript. XL designed the research, interpreted the results, critically reviewed  
13  
14 and edited the manuscript and funding, and supervised. ZH offered research  
15  
16 data and edited the manuscript. All authors read and approved the final  
17  
18 manuscript.  
19  
20  
21  
22

23  
24 **Funding** This work was supported by the National Infectious Disease  
25  
26 Surveillance Program of the Ministry of Science and Technology of the People's  
27  
28 Republic of China (No.2012ZX10004201) and the National Natural Science  
29  
30 Foundation of China (No. 30571618) .The funders had no role in study design,  
31  
32 data collection and analysis, decision to publish, or preparation of the  
33  
34 manuscript.  
35  
36  
37  
38

39 **Competing interests** None.

40  
41 **Provenance and peer review** Not commissioned; externally peer reviewed.

42  
43  
44 **Data sharing statement** No additional data are available.

## 45 46 REFERENCES

- 47  
48  
49 1. Seleem MN, Boyle SM, Sriranganathan N. Brucellosis: a re-emerging zoonosis. *Vet Microbiol*  
50  
51 2010;**140**(3):392-98.  
52  
53  
54 2. De Massis F, Di Girolamo A, Petrini A, *et al.* Correlation between animal and human brucellosis in  
55  
56 Italy during the period 1997–2002. *Clin Microbiol Infect* 2005;**11**(8):632-36.  
57  
58  
59  
60

- 1  
2  
3  
4 3. Marianelli C, Graziani C, Santangelo C, *et al.* Molecular epidemiological and antibiotic susceptibility  
5  
6 characterization of *Brucella* isolates from humans in Sicily, Italy. *J Clin Microbiol*  
7  
8 2007;**45**(9):2923-28.  
9
- 10  
11 4. Memish ZA, Balkhy HH. Brucellosis and international travel. *J Travel Med* 2004;**11**(1):49-55.  
12
- 13  
14 5. Wang D, Cui B, Wang Y, *et al.* Analysis on surveillance data of brucellosis in China, 2009. *Disease*  
15  
16 *surveillance* 2010;**25**(12):944-46.  
17
- 18  
19 6. Lim HS, Min YS, Lee HS. Investigation of a series of brucellosis cases in Gyeongsangbuk-do during  
20  
21 2003-2004. *J Prev Med Public Health* 2005;**38**(4):482-88.  
22
- 23  
24 7. Pappas G, Papadimitriou P, Akritidis N, *et al.* The new global map of human brucellosis. *Lancet Infect*  
25  
26 *Dis* 2006;**6**(2):91-99.  
27
- 28  
29 8. Shang D, Xiao D, Yin J. Epidemiology and control of brucellosis in China. *Vet Microbiol*  
30  
31 2002;**90**(1):165-82.  
32
- 33  
34 9. Zhang J. Reasons and prevention and control measures for the high brucellosis incidence. *Disease*  
35  
36 *surveillance* 2010;**25**(5):341-42.  
37
- 38  
39 10. Li Y, Yu X, He T. An analysis of brucellosis epidemic situation in humans from 2004 to 2010 in  
40  
41 China. *Chinese Journal of Control of Endemic Disenaces* 2012;**27**(1):18-20.  
42
- 43  
44 11. Gao G, Xu J, Ke Y, *et al.* Literature analysis of brucellosis epidemic situation and research progress  
45  
46 in China from 2000 to 2010. *Chinese Journal of Zoonoses* 2012;**28**(12):1178-84.  
47
- 48  
49 12. Anselin L. Exploratory spatial data analysis and geographic information systems. *New tools for*  
50  
51 *spatial analysis* 1994;19-33.  
52
- 53  
54 13. Anselin L. Interactive techniques and exploratory spatial data analysis. *Geographical Information*  
55  
56 *Systems: principles, techniques, management and applications* 1999;**1**:251-64.  
57  
58  
59  
60

- 1  
2  
3  
4 14. Owusu Edusei K, Owens CJ. Monitoring county-level chlamydia incidence in Texas, 2004–2005:  
5  
6 application of empirical Bayesian smoothing and Exploratory Spatial Data Analysis (ESDA)  
7  
8 methods. *Int J Health Geogr* 2009;**8**(1):12.  
9
- 10  
11 15. Martins - Melo FR, Ramos AN, Alencar CH, et al. Mortality of Chagas' disease in Brazil: spatial  
12  
13 patterns and definition of high - risk areas. *Trop Med Int Health* 2012;**17**(9):1066-75.  
14
- 15  
16 16. Clayton D, Kaldor J. Empirical Bayes estimates of age-standardized relative risks for use in disease  
17  
18 mapping. *Biometrics* 1987:671-81.  
19
- 20  
21 17. Abdullayev R, Kracalik I, Ismayilova R, et al. Analyzing the spatial and temporal distribution of  
22  
23 human brucellosis in Azerbaijan (1995-2009) using spatial and spatio-temporal statistics. *BMC Infect*  
24  
25 *Dis* 2012;**12**(1):185.  
26
- 27  
28 18. Wang L, Wang Y, Yang G, et al. China Information System for Disease Control and Prevention  
29  
30 (CISDCP). <http://www.pacifichealthsummit.org/downloads/HITCaseStudies/Functional>  
31  
32 [/CISDCP.pdf](#) (Accessed 26 January 2013).  
33
- 34  
35 19. Cao M, Feng Z, Zhang J, et al. Contextual risk factors for regional distribution of Japanese  
36  
37 encephalitis in the People's Republic of China. *Trop Med Int Health* 2010;**15**(8):918-23.  
38
- 39  
40 20. Zhang W, Guo W, Sun S, et al. Human brucellosis, Inner Mongolia, China. *Emerg Infect Dis*  
41  
42 **2010**;**16**(12):2001-03  
43
- 44  
45 21. Yin F, Feng Z, Li X. Spatial analysis of primary and secondary syphilis incidence in China,  
46  
47 2004–2010. *Int J STD AIDS* 2012;**23**(12):870-75.  
48
- 49  
50 22. Maguire DJ, Batty M, Goodchild MF. GIS, spatial analysis and modelling. *ESRI, Redlands, CA,*  
51  
52 2005:93–111.  
53
- 54  
55 23. Anselin L, Lozano N, Koschinsky J. Rate transformations and smoothing. *Urbana* 2006;**51**:61801.  
56  
57  
58  
59  
60

- 1  
2  
3  
4 24. Anselin L. Exploring spatial data with GeoDaTM: a workbook. *Urbana* 2004;**51**:61801.
- 5  
6 25. Anselin L, Syabri I, Kho Y. GeoDa: an introduction to spatial data analysis. *Geographical analysis*  
7  
8 2006;**38**(1):5-22.
- 9  
10  
11 26. Anselin L. Local indicators of spatial association—LISA. *Geographical analysis* 1995;**27**(2):93-115
- 12  
13 27. Fang L, Yan L, Liang S, et al. Spatial analysis of hemorrhagic fever with renal syndrome in China.  
14  
15 *BMC Infect Dis* 2006;**6**(1):77
- 16  
17  
18 28. Dewan AM, Corner R, Hashizume M, et al. Typhoid Fever and Its Association with Environmental  
19  
20 Factors in the Dhaka Metropolitan Area of Bangladesh: A Spatial and Time-Series Approach. *PLoS*  
21  
22 *Negl Trop Dis* 2013;**7**(1):e1998.
- 23  
24  
25 29. Fosgate GT, Carpenter TE, Chomel BB, Case JT, DeBess EE, Reilly KF. Time-space clustering of  
26  
27 human brucellosis, California, 1973-1992. *Emerg. Infect. Dis* 2002;**8**(7):672-78
- 28  
29  
30 30. Zhong Z, Yu S, Wang X, et al. Human brucellosis in the People's Republic of China during  
31  
32 2005-2010. *Int J Infect Dis* 2013:289-92.
- 33  
34  
35 31. Al-Shamahy H, Whitty C, Wright S. Risk factors for human brucellosis in Yemen: a case control  
36  
37 study. *Epidemiol Infect* 2000;**125**(2):309-13.
- 38  
39  
40 32. Chen Z, Zhang W, Ke Y, et al. High-Risk Regions of Human Brucellosis in China: Implications for  
41  
42 Prevention and Early Diagnosis of Travel-Related Infections. *Clin Infect Dis* 2013;**57**(2):330-32.
- 43  
44  
45 33. Jackson MC, Huang L, Luo J, et al. Comparison of tests for spatial heterogeneity on data with global  
46  
47 clustering patterns and outliers. *Int J Health Geogr* 2009;**8**(1):55.
- 48  
49  
50  
51  
52  
53  
54  
55  
56  
57  
58  
59  
60



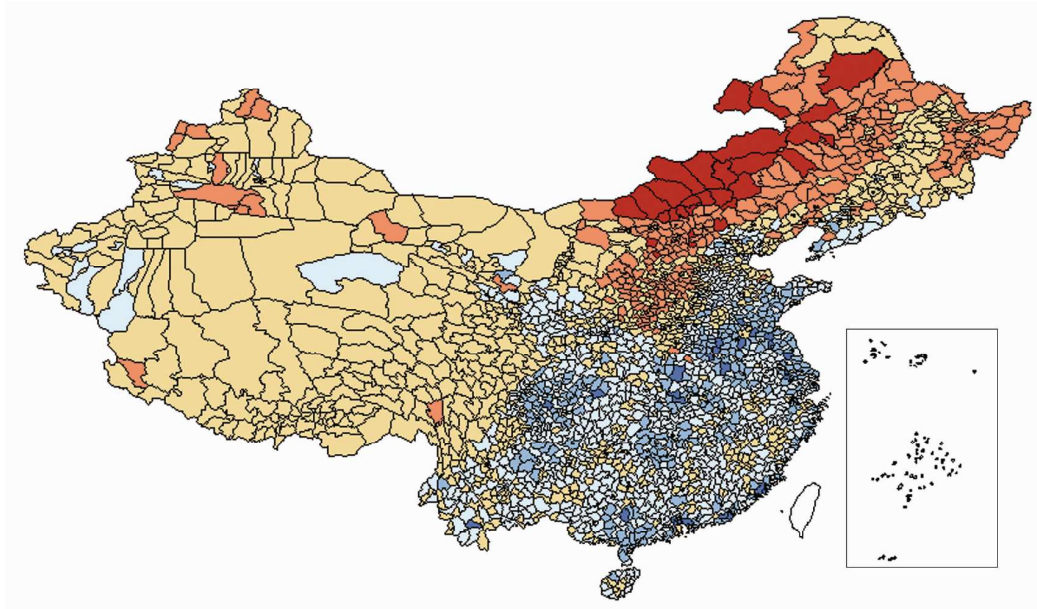

Figure 1 Percentile map of annual EB smoothed incidence rates for human brucellosis in mainland China by county, 2004-2010

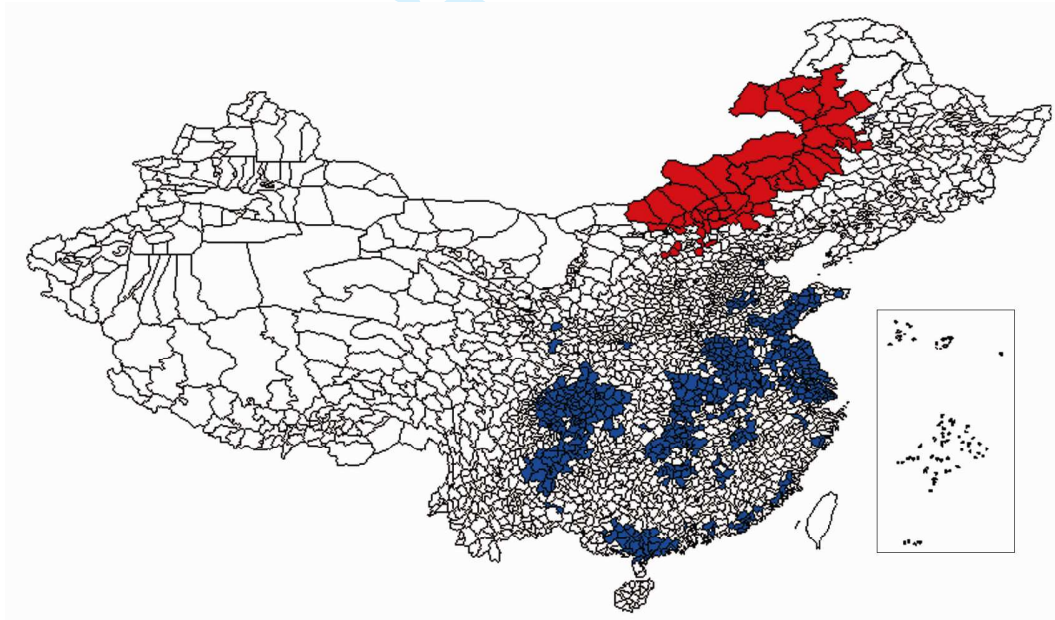

Figure 2 LISA cluster map of annual EB smoothed incidence rates for human brucellosis in mainland China by county, 2004-2010

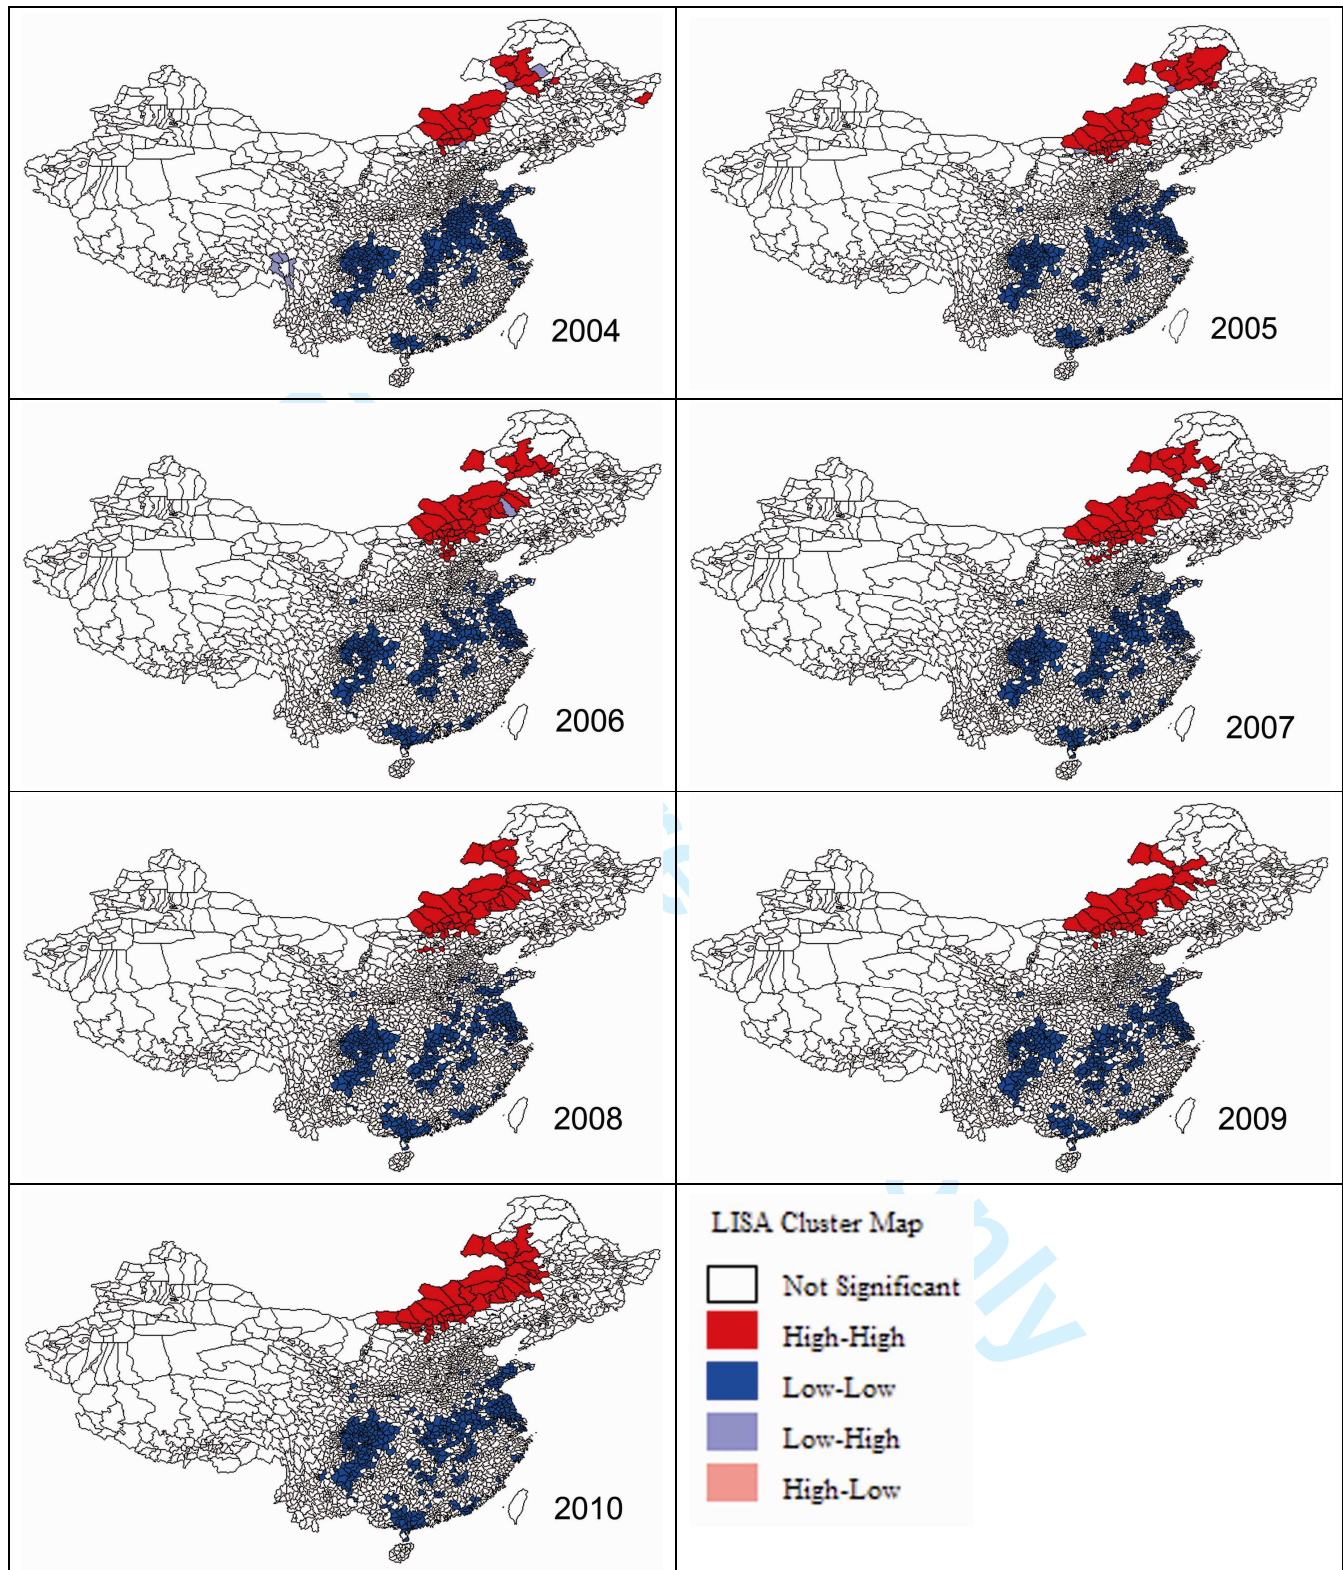

Figure 3 LISA cluster maps of EB smoothed incidence rates for human brucellosis in mainland China by county (per year), 2004-2010

## Figure legends

### Percentile: EBS-Smoothed

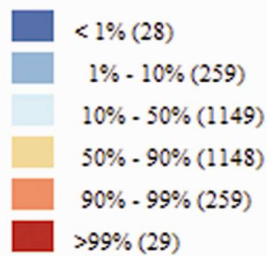

Figure legend 1 (for Figure 1)

### LISA Cluster Map

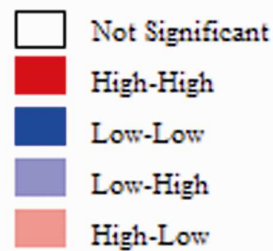

Figure legend 2 (for Figure 2 and Figure 3)

1  
2  
3  
4  
5  
6  
7  
8  
9  
10  
11  
12  
13  
14  
15  
16  
17  
18  
19  
20  
21  
22  
23  
24  
25  
26  
27  
28  
29  
30  
31  
32  
33  
34  
35  
36  
37  
38  
39  
40  
41  
42  
43  
44  
45  
46  
47  
48  
49  
50  
51  
52  
53  
54  
55  
56  
57  
58  
59  
60

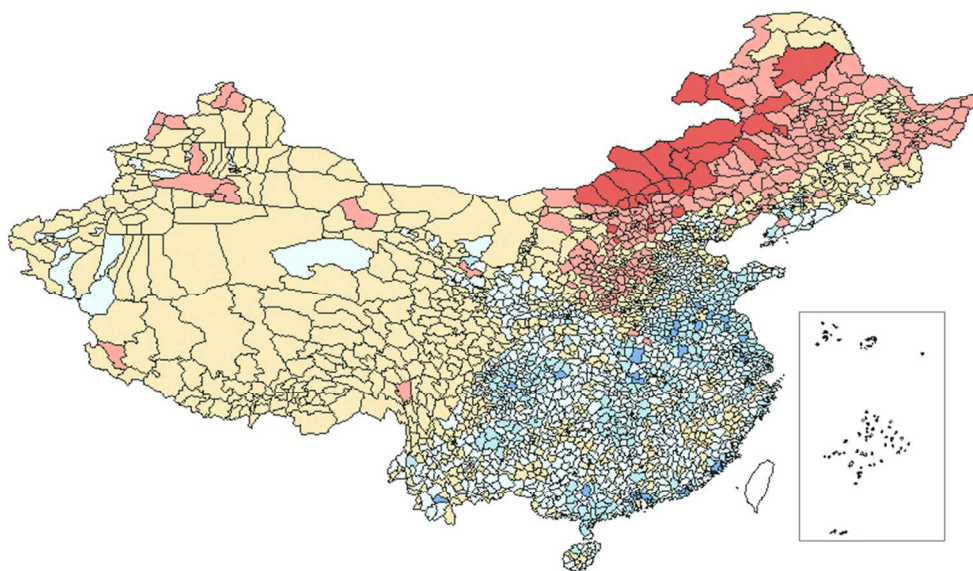

Figure 1 Percentile map of annual EB smoothed incidence rates for human brucellosis in mainland China by county, 2004-2010  
102x60mm (300 x 300 DPI)

review only

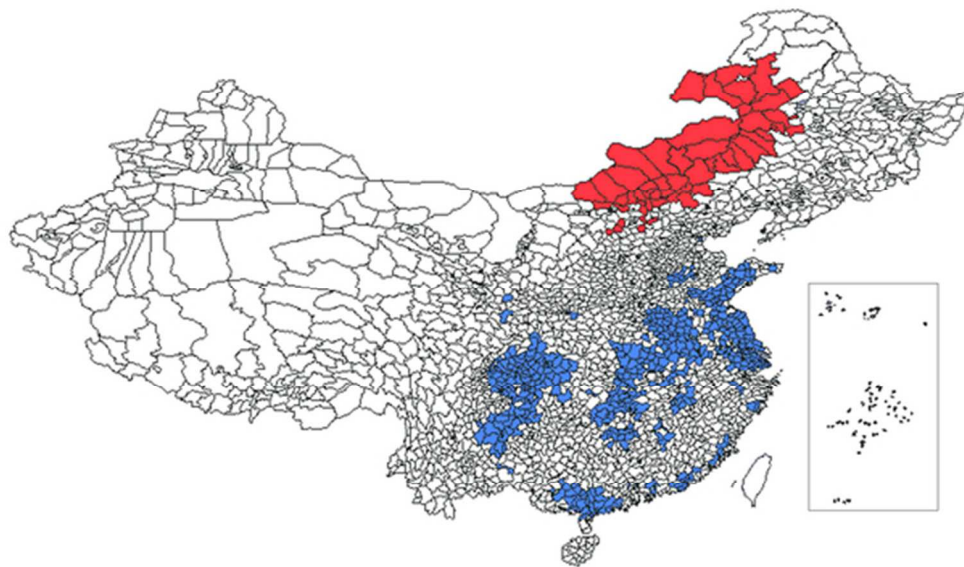

Figure 2 LISA cluster map of annual EB smoothed incidence rates for human brucellosis in mainland China by county, 2004-2010  
52x30mm (300 x 300 DPI)

1  
2  
3  
4  
5  
6  
7  
8  
9  
10  
11  
12  
13  
14  
15  
16  
17  
18  
19  
20  
21  
22  
23  
24  
25  
26  
27  
28  
29  
30  
31  
32  
33  
34  
35  
36  
37  
38  
39  
40  
41  
42  
43  
44  
45  
46  
47  
48  
49  
50  
51  
52  
53  
54  
55  
56  
57  
58  
59  
60

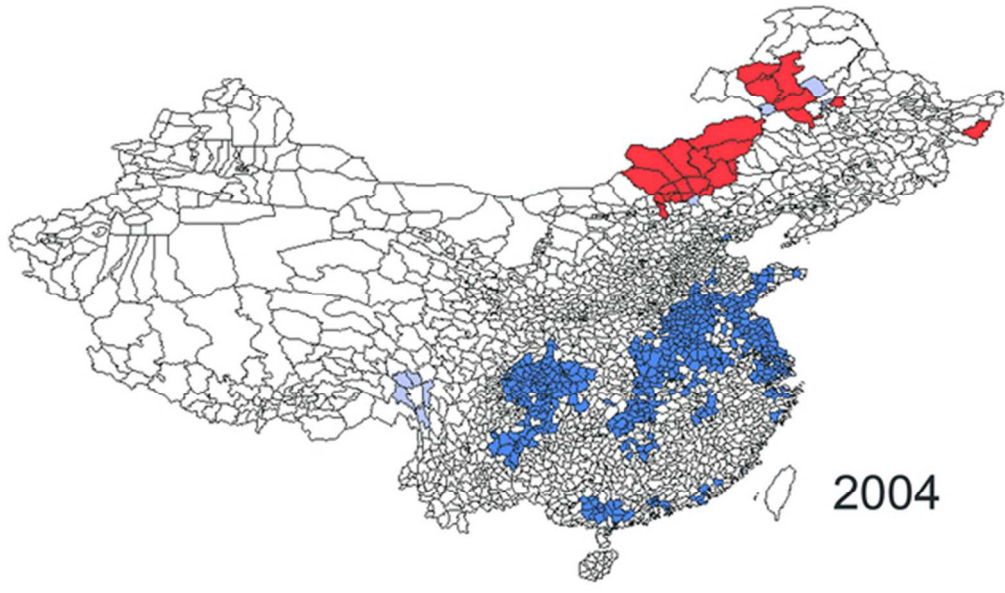

Figure 3 LISA cluster maps of EB smoothed incidence rates for human brucellosis in mainland China by county (per year), 2004-2010  
53x31mm (300 x 300 DPI)

Review only

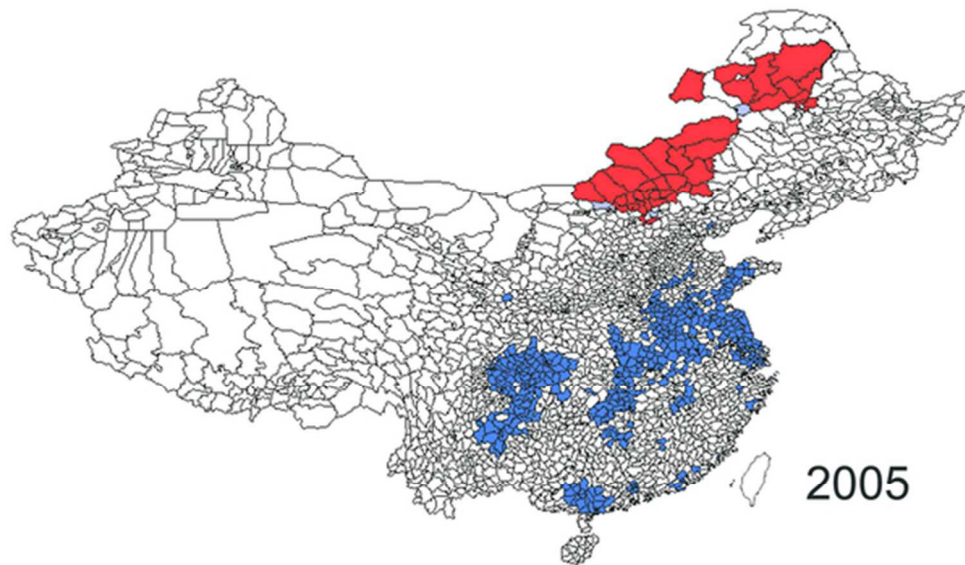

Figure 3 LISA cluster maps of EB smoothed incidence rates for human brucellosis in mainland China by county (per year), 2004-2010  
52x30mm (300 x 300 DPI)

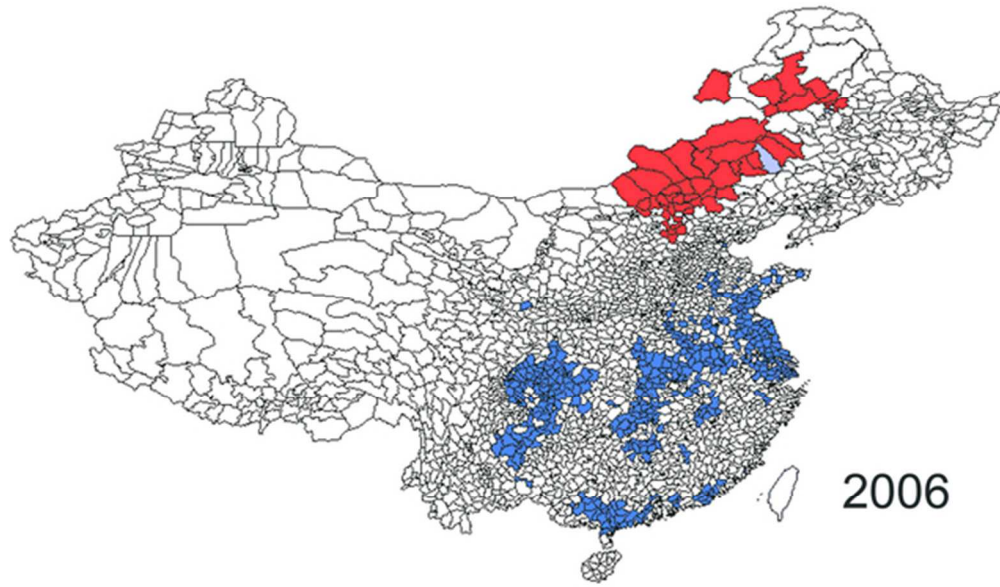

Figure 3 LISA cluster maps of EB smoothed incidence rates for human brucellosis in mainland China by county (per year), 2004-2010  
53x32mm (300 x 300 DPI)

review only



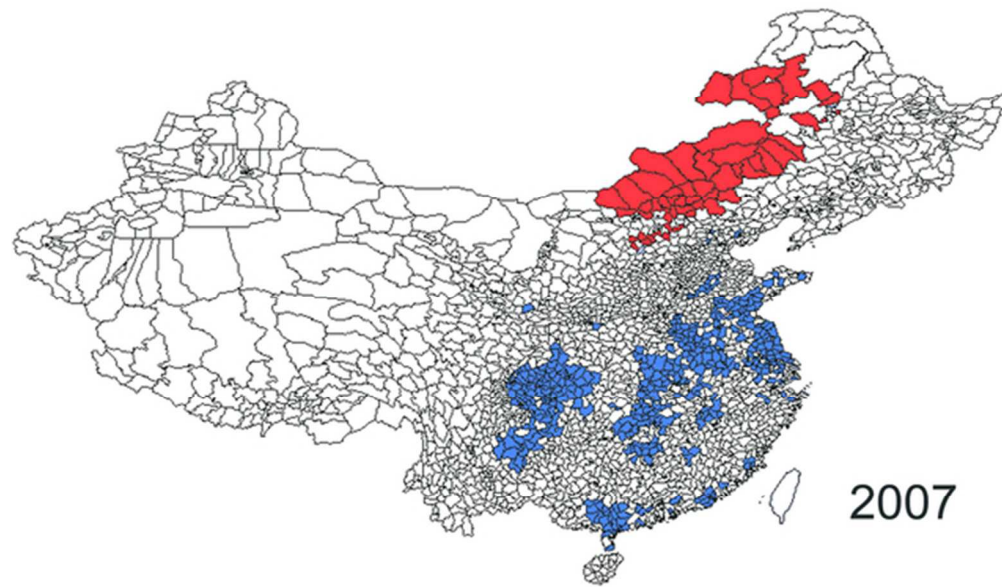

Figure 3 LISA cluster maps of EB smoothed incidence rates for human brucellosis in mainland China by county (per year), 2004-2010  
53x32mm (300 x 300 DPI)

1  
2  
3  
4  
5  
6  
7  
8  
9  
10  
11  
12  
13  
14  
15  
16  
17  
18  
19  
20  
21  
22  
23  
24  
25  
26  
27  
28  
29  
30  
31  
32  
33  
34  
35  
36  
37  
38  
39  
40  
41  
42  
43  
44  
45  
46  
47  
48  
49  
50  
51  
52  
53  
54  
55  
56  
57  
58  
59  
60

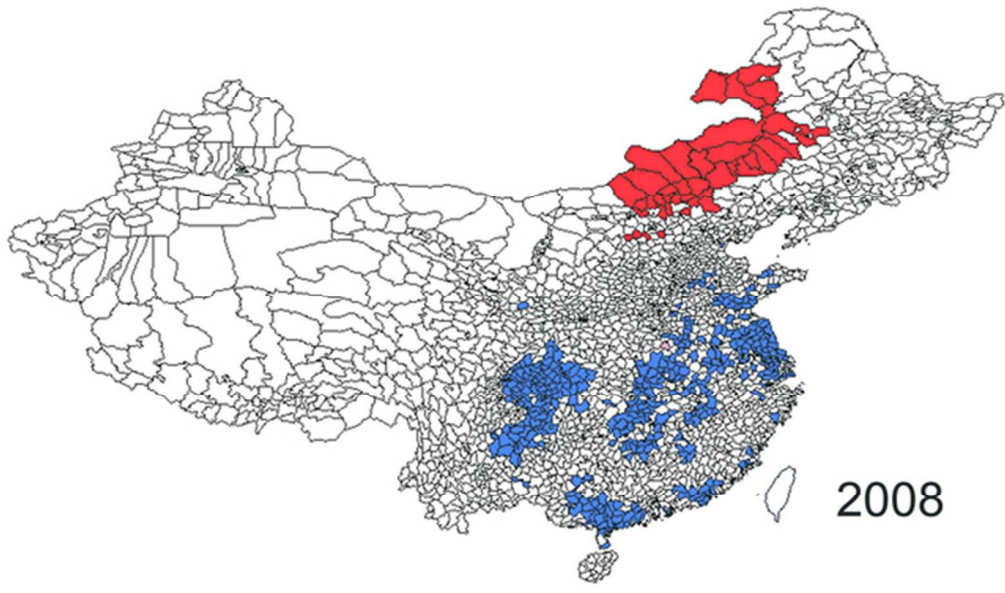

Figure 3 LISA cluster maps of EB smoothed incidence rates for human brucellosis in mainland China by county (per year), 2004-2010  
53x32mm (300 x 300 DPI)

review only

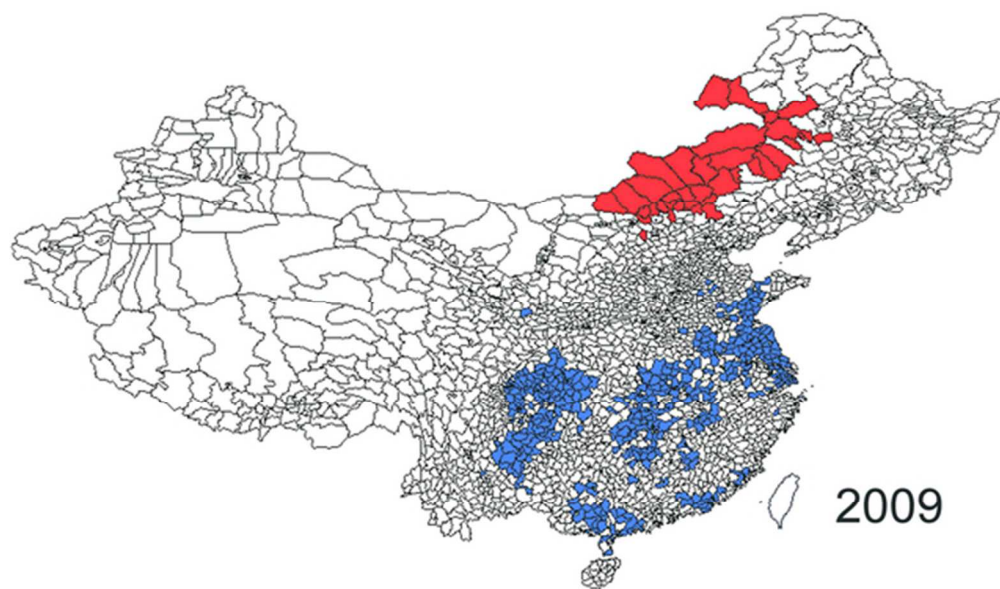

Figure 3 LISA cluster maps of EB smoothed incidence rates for human brucellosis in mainland China by county (per year), 2004-2010  
54x32mm (300 x 300 DPI)

1  
2  
3  
4  
5  
6  
7  
8  
9  
10  
11  
12  
13  
14  
15  
16  
17  
18  
19  
20  
21  
22  
23  
24  
25  
26  
27  
28  
29  
30  
31  
32  
33  
34  
35  
36  
37  
38  
39  
40  
41  
42  
43  
44  
45  
46  
47  
48  
49  
50  
51  
52  
53  
54  
55  
56  
57  
58  
59  
60

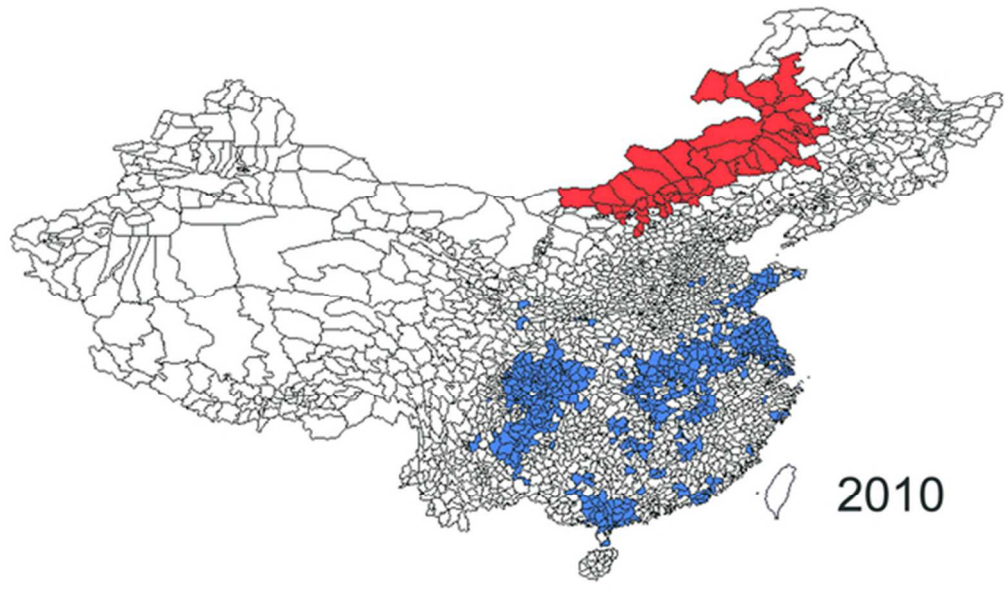

Figure 3 LISA cluster maps of EB smoothed incidence rates for human brucellosis in mainland China by county (per year), 2004-2010  
53x32mm (300 x 300 DPI)

review only
